# Supplementary material
Source: PubMed Central journal article supplement (PMC3985946)
Supplement: supp_1.1.E1_appendix3-E1.pdf [file supp_1.1.E1_appendix3-E1.pdf]

### Appendix 3: Supplementary tables (as supplied by the authors)

**Table A** – Mean (95% confidence interval) direct health care costs by tumour site and resource for prediagnosis phase for cancer patients who survived beyond the first year after diagnosis in 2009 Canadian dollars

| Type of Cancer | Total Cost              | Hospital-based Care       |                   |                   |                  | Tertiary Care     |                   | Other                   |                    |                   |
|----------------|-------------------------|---------------------------|-------------------|-------------------|------------------|-------------------|-------------------|-------------------------|--------------------|-------------------|
|                |                         | Inpatient Hospitalization | Same-day Surgery  | ED Visits         | Home Care        | Continuing Care   | Long-term Care    | Diagnostic Tests        | Physician Services | Outpatient Drugs  |
| Liver          | 4,128<br>(3,591; 4,664) | 1,511<br>(1,050; 1,972)   | 122<br>(103; 142) | 106<br>(85; 127)  | 103<br>(66; 139) | -                 | 87<br>(-83; 257)  | 1,421<br>(1,319; 1,522) | 534<br>(488; 580)  | 244<br>(210; 277) |
| Myeloma        | 3,921<br>(3,732; 4,111) | 861<br>(739; 984)         | 67<br>(58; 77)    | 126<br>(115; 137) | 112<br>(93; 132) | 76<br>(6; 145)    | 26<br>(-24; 76)   | 2,172<br>(2,077; 2,266) | 259<br>(240; 277)  | 223<br>(206; 239) |
| Pancreas       | 3,207<br>(3,018; 3,395) | 896<br>(754; 1,038)       | 218<br>(193; 243) | 134<br>(119; 149) | 45<br>(26; 64)   | 28<br>(-19; 74)   | -                 | 1,313<br>(1,241; 1,385) | 397<br>(369; 425)  | 177<br>(159; 195) |
| Lung           | 2,853<br>(2,787; 2,919) | 602<br>(555; 649)         | 162<br>(156; 168) | 70<br>(66; 73)    | 91<br>(82; 99)   | 23<br>(-2; 47)    | 14<br>(1; 28)     | 1,190<br>(1,168; 1,211) | 449<br>(440; 458)  | 253<br>(246; 259) |
| Renal          | 2,614<br>(2,519; 2,709) | 469<br>(418; 519)         | 111<br>(103; 118) | 80<br>(74; 85)    | 58<br>(49; 68)   | 11<br>(-1; 24)    | 36<br>(-20; 92)   | 1,116<br>(1,082; 1,150) | 547<br>(533; 561)  | 186<br>(178; 194) |
| Other tumours  | 2,448<br>(2,313; 2,584) | 766<br>(707; 825)         | 104<br>(99; 109)  | 77<br>(72; 81)    | 90<br>(81; 99)   | 68<br>(-19; 156)  | 71<br>(19; 124)   | 808<br>(788; 829)       | 286<br>(277; 294)  | 178<br>(172; 184) |
| Gastric        | 2,235<br>(2,080; 2,390) | 617<br>(490; 744)         | 105<br>(96; 115)  | 75<br>(67; 83)    | 80<br>(64; 96)   | 11<br>(-9; 32)    | 14<br>(-14; 42)   | 926<br>(883; 968)       | 176<br>(161; 191)  | 230<br>(217; 242) |
| Colorectal     | 2,223<br>(2,073; 2,374) | 512<br>(486; 538)         | 102<br>(99; 106)  | 68<br>(66; 70)    | 83<br>(78; 88)   | 199<br>(78; 320)  | 114<br>(73; 156)  | 804<br>(793; 815)       | 149<br>(145; 153)  | 192<br>(189; 195) |
| Brain          | 2,221<br>(2,067; 2,376) | 940<br>(813; 1,067)       | 27<br>(15; 38)    | 192<br>(176; 207) | 27<br>(15; 40)   | 9<br>(-5; 22)     | -                 | 555<br>(512; 597)       | 421<br>(391; 450)  | 52<br>(45; 60)    |
| Lymphoma       | 2,207<br>(2,119; 2,296) | 475<br>(413; 538)         | 78<br>(72; 85)    | 78<br>(72; 84)    | 51<br>(42; 60)   | 17<br>(-4; 37)    | 16<br>(-7; 39)    | 1,026<br>(993; 1,058)   | 332<br>(319; 345)  | 134<br>(124; 143) |
| Ovary          | 2,098<br>(1,993; 2,204) | 361<br>(317; 406)         | 53<br>(48; 58)    | 79<br>(73; 86)    | 46<br>(36; 56)   | -                 | 59<br>(-20; 138)  | 1,081<br>(1,045; 1,118) | 308<br>(297; 318)  | 110<br>(104; 117) |
| Leukemia       | 2,088<br>(1,886; 2,290) | 335<br>(286; 384)         | 45<br>(39; 50)    | 56<br>(51; 62)    | 55<br>(44; 66)   | 108<br>(-40; 255) | 112<br>(20; 204)  | 1,126<br>(1,085; 1,167) | 91<br>(83; 99)     | 161<br>(147; 175) |
| Bladder        | 2,057<br>(1,970; 2,144) | 452<br>(406; 498)         | 169<br>(161; 177) | 54<br>(51; 58)    | 89<br>(78; 100)  | 20<br>(4; 36)     | 52<br>(-5; 110)   | 805<br>(783; 826)       | 175<br>(168; 182)  | 241<br>(234; 249) |
| Esophagus      | 1,871<br>(1,671; 2,071) | 492<br>(334; 651)         | 119<br>(101; 138) | 50<br>(41; 58)    | 51<br>(32; 70)   | -                 | 20<br>(-19; 58)   | 695<br>(643; 747)       | 223<br>(191; 255)  | 221<br>(203; 238) |
| Corpus uteri   | 1,615<br>(1,454; 1,776) | 173<br>(144; 201)         | 62<br>(58; 67)    | 29<br>(26; 31)    | 67<br>(57; 76)   | 93<br>(-8; 193)   | 147<br>(46; 248)  | 778<br>(757; 799)       | 128<br>(124; 133)  | 139<br>(133; 145) |
| Female breast  | 1,600<br>(1,469; 1,732) | 109<br>(99; 118)          | 33<br>(32; 35)    | 14<br>(13; 15)    | 63<br>(60; 67)   | 193<br>(82; 303)  | 175<br>(130; 219) | 749<br>(740; 758)       | 136<br>(134; 138)  | 128<br>(126; 131) |

|                    |                |            |          |          |          |            |               |            |            |            |
|--------------------|----------------|------------|----------|----------|----------|------------|---------------|------------|------------|------------|
|                    | 1,473          | 204        | 65       | 23       | 40       | 113        | 96            | 661        | 86         | 184        |
| Prostate           | (1,359; 1,587) | (191; 217) | (63; 67) | (22; 24) | (37; 43) | (23; 203)  | (62; 131)     | (652; 669) | (84; 88)   | (182; 187) |
| Head and neck      | 1,291          | 206        | 59       | 31       | 60       | 158        | 39            | 465        | 107        | 166        |
|                    | (1,060; 1,522) | (176; 236) | (54; 64) | (28; 34) | (50; 70) | (-31; 347) | (-2; 79)      | (447; 484) | (101; 114) | (159; 174) |
| Thyroid            | 1,236          | 163        | 34       | 18       | 18       | 2          | 46            | 768        | 133        | 56         |
|                    | (1,136; 1,335) | (140; 186) | (30; 39) | (15; 20) | (13; 22) | (-1; 5)    | (-44; 136)    | (742; 793) | (127; 139) | (51; 60)   |
| Testis             | 1,215          | 99         | 18       | 45       | 11       |            |               | 786        | 230        | 25         |
|                    | (1,153; 1,276) | (66; 132)  | (13; 22) | (40; 51) | (2; 19)  | -          | -             | (745; 828) | (216; 245) | (18; 33)   |
| Cervix             | 1,093          | 134        | 45       | 33       | 33       | 8          |               | 633        | 78         | 67         |
|                    | (989; 1,197)   | (106; 162) | (39; 51) | (28; 38) | (22; 43) | (-8; 23)   | 62 (-24; 149) | (600; 665) | (71; 85)   | (59; 75)   |
| Melanoma           | 890            | 127        | 30       | 17       | 50       | 60         |               | 383        | 50         | 120        |
|                    | (795; 985)     | (110; 145) | (27; 33) | (15; 18) | (43; 58) | (-7; 128)  | 52 (10; 95)   | (370; 396) | (46; 53)   | (115; 125) |
| <b>All Cancers</b> | 1,852          | 331        | 74       | 43       | 62       | 112        | 94            | 796        | 176        | 164        |
|                    | (1,808; 1,897) | (323; 339) | (73; 75) | (43; 44) | (60; 63) | (76; 147)  | (80; 109)     | (791; 800) | (174; 177) | (163; 166) |

Legend: ED – emergency department

**Table B** – Mean (95% confidence interval) direct health care costs by tumour site and resource for prediagnosis phase for cancer patients who died within the first year after diagnosis in 2009 Canadian dollars

| Type of Cancer | Total Cost              | Hospital-based Care       |                   |                   | Tertiary Care     |                      |                   | Other                   |                    |                   |
|----------------|-------------------------|---------------------------|-------------------|-------------------|-------------------|----------------------|-------------------|-------------------------|--------------------|-------------------|
|                |                         | Inpatient Hospitalization | Same-day Surgery  | ED Visits         | Home Care         | Continuing Care      | Long-term Care    | Diagnostic Tests        | Physician Services | Outpatient Drugs  |
| Myeloma        | 5,142<br>(4,664; 5,620) | 1,645<br>(1,286; 2,005)   | 88<br>(67; 110)   | 211<br>(182; 239) | 366<br>(291; 442) | 166<br>(25; 306)     | 110<br>(4; 217)   | 1,928<br>(1,758; 2,099) | 292<br>(248; 337)  | 335<br>(302; 367) |
| Testis         | 5,002<br>(1,904; 8,100) | 2,720<br>(-157; 5,598)    | 22<br>(-8; 52)    | 185<br>(82; 288)  | 270<br>(3; 537)   | -                    | -                 | 1,207<br>(695; 1,719)   | 287<br>(156; 417)  | 311<br>(41; 581)  |
| Lymphoma       | 4,161<br>(3,807; 4,516) | 1,489<br>(1,200; 1,777)   | 140<br>(112; 168) | 180<br>(159; 201) | 252<br>(203; 302) | 52<br>(0; 103)       | 60<br>(11; 110)   | 1,307<br>(1,206; 1,409) | 354<br>(323; 385)  | 327<br>(297; 357) |
| Liver          | 3,804<br>(3,515; 4,094) | 936<br>(741; 1,132)       | 112<br>(93; 131)  | 161<br>(139; 182) | 191<br>(136; 246) | 47<br>(-20; 114)     | 21<br>(-21; 64)   | 1,684<br>(1,549; 1,819) | 387<br>(352; 421)  | 266<br>(234; 297) |
| Prostate       | 3,534<br>(3,221; 3,846) | 1,057<br>(870; 1,244)     | 86<br>(73; 98)    | 105<br>(91; 119)  | 371<br>(317; 424) | 147<br>(9; 285)      | 237<br>(135; 339) | 972<br>(910; 1,034)     | 166<br>(149; 183)  | 394<br>(372; 416) |
| Other tumours  | 3,488<br>(3,327; 3,649) | 1,149<br>(1,025; 1,272)   | 111<br>(102; 119) | 159<br>(149; 169) | 227<br>(202; 251) | 87<br>(26; 149)      | 42<br>(23; 62)    | 1,128<br>(1,088; 1,168) | 317<br>(303; 332)  | 268<br>(257; 280) |
| Renal          | 3,382<br>(3,002; 3,762) | 890<br>(636; 1,143)       | 104<br>(88; 120)  | 136<br>(120; 152) | 131<br>(96; 166)  | 9<br>(-4; 23)        | 61<br>(-7; 129)   | 1,299<br>(1,213; 1,385) | 516<br>(379; 653)  | 237<br>(214; 259) |
| Pancreas       | 3,237<br>(3,123; 3,351) | 804<br>(720; 888)         | 157<br>(145; 169) | 165<br>(153; 176) | 114<br>(95; 133)  | -                    | 2<br>(-2; 7)      | 1,402<br>(1,352; 1,452) | 330<br>(316; 345)  | 262<br>(249; 275) |
| Brain          | 3,168<br>(2,947; 3,389) | 1,475<br>(1,288; 1,661)   | 37<br>(27; 48)    | 190<br>(175; 206) | 134<br>(108; 160) | 37<br>(-7; 82)       | 12<br>(-3; 27)    | 773<br>(727; 820)       | 324<br>(293; 354)  | 185<br>(172; 199) |
| Bladder        | 3,150<br>(2,915; 3,385) | 990<br>(794; 1,187)       | 136<br>(122; 149) | 120<br>(107; 133) | 346<br>(293; 398) | 58<br>(12; 103)      | 79<br>(26; 133)   | 873<br>(824; 922)       | 207<br>(188; 226)  | 341<br>(323; 360) |
| Corpus uteri   | 3,083<br>(2,363; 3,803) | 523<br>(333; 713)         | 45<br>(31; 60)    | 117<br>(92; 141)  | 411<br>(295; 527) | 493<br>(-155; 1,141) | 30<br>(-17; 78)   | 949<br>(852; 1,046)     | 204<br>(176; 232)  | 311<br>(279; 343) |
| Leukemia       | 2,983<br>(2,735; 3,231) | 1,008<br>(823; 1,193)     | 84<br>(66; 103)   | 126<br>(110; 142) | 197<br>(152; 243) | 33<br>(-16; 83)      | 24<br>(-1; 48)    | 1,112 (1,033;           | 113 (93; 134)      | 285<br>(249; 321) |
| Lung           | 2,940<br>(2,855; 3,025) | 746<br>(674; 818)         | 99<br>(94; 104)   | 123<br>(119; 127) | 140<br>(130; 149) | 47<br>(25; 70)       | 27<br>(17; 36)    | 1,134<br>(1,113; 1,155) | 333<br>(326; 340)  | 291<br>(285; 298) |
| Ovary          | 2,936<br>(2,676; 3,197) | 779<br>(589; 970)         | 63<br>(51; 75)    | 153<br>(132; 174) | 186<br>(135; 236) | 65<br>(-28; 157)     | 11<br>(-10; 32)   | 1,142<br>(1,063; 1,221) | 296<br>(270; 323)  | 243<br>(217; 268) |
| Colorectal     | 2,855<br>(2,735; 2,975) | 815<br>(730; 901)         | 81<br>(74; 88)    | 114<br>(107; 120) | 219<br>(200; 238) | 86<br>(31; 140)      | 63<br>(39; 87)    | 1,012<br>(983; 1,041)   | 188<br>(179; 196)  | 278<br>(267; 290) |
| Gastric        | 2,704<br>(2,570; 2,839) | 665<br>(577; 753)         | 84<br>(74; 95)    | 122<br>(111; 132) | 178<br>(151; 205) | 53<br>(5; 101)       | 40<br>(15; 64)    | 1,074<br>(1,029; 1,120) | 202<br>(189; 215)  | 285<br>(269; 302) |
| Female breast  | 2,568<br>(2,372; 2,765) | 516<br>(419; 614)         | 36<br>(23; 49)    | 74<br>(63; 85)    | 430<br>(375; 486) | 101<br>(20; 181)     | 166<br>(84; 248)  | 784<br>(734; 834)       | 153<br>(136; 170)  | 308<br>(288; 327) |
| Head and neck  | 2,545<br>(2,225; 2,865) | 810<br>(621; 999)         | 69<br>(55; 84)    | 85<br>(72; 98)    | 270<br>(224; 316) | 189<br>(5; 374)      | 76<br>(21; 130)   | 602<br>(552; 651)       | 156<br>(138; 174)  | 288<br>(269; 308) |

|                    |                       |                   |                 |                   |                   |                 |                 |                       |                   |                   |
|--------------------|-----------------------|-------------------|-----------------|-------------------|-------------------|-----------------|-----------------|-----------------------|-------------------|-------------------|
|                    | 2,451                 | 823               | 47              | 75                | 403               |                 |                 | 654                   | 161               | 287               |
| Melanoma           | (2,048; 2,853)        | (479; 1,167)      | (32; 63)        | (58; 92)          | (303; 503)        | -               | -               | (573; 735)            | (131; 192)        | (255; 319)        |
|                    | 2,385                 | 469               | 17              | 108               | 179               |                 | 32              | 1,028                 | 268               | 283               |
| Thyroid            | (1,919; 2,851)        | (197; 742)        | (1; 34)         | (66; 150)         | (53; 305)         | -               | (-31; 95)       | (835; 1,221)          | (171; 364)        | (223; 343)        |
|                    | 2,378                 | 592               | 51              | 109               | 235               |                 | 85              | 870                   | 184               | 252               |
| Cervix             | (1,965; 2,791)        | (302; 883)        | (30; 72)        | (82; 137)         | (133; 337)        | -               | (-50; 220)      | (754; 986)            | (147; 221)        | (187; 317)        |
|                    | 2,188                 | 532               | 77              | 88                | 173               | 21              | 36              | 810                   | 178               | 273               |
| Esophagus          | (2,040; 2,336)        | (430; 634)        | (67; 88)        | (78; 98)          | (136; 209)        | (-12; 53)       | (-6; 78)        | (759; 862)            | (163; 192)        | (256; 291)        |
|                    | 3,036                 | 861               | 93              | 129               | 200               | 65              | 48              | 1,081                 | 274               | 284               |
| <b>All Cancers</b> | <b>(2,991; 3,080)</b> | <b>(827; 895)</b> | <b>(91; 96)</b> | <b>(126; 131)</b> | <b>(194; 207)</b> | <b>(50; 81)</b> | <b>(40; 55)</b> | <b>(1,070; 1,093)</b> | <b>(269; 278)</b> | <b>(280; 288)</b> |

Legend: ED – emergency department

**Table C – Mean (95% confidence interval) direct health care costs by tumour site for initial phase cancer patients who survived beyond the first year after diagnosis in 2009 Canadian dollars**

| Type of Cancer | Hospital-based Care        |                            |                         |                   | Tertiary Care           |                         |                         | Other                   |                         |                         |
|----------------|----------------------------|----------------------------|-------------------------|-------------------|-------------------------|-------------------------|-------------------------|-------------------------|-------------------------|-------------------------|
|                | Total Cost                 | Inpatient Hospitalization  | Same-day Surgery        | ED Visits         | Home Care               | Continuing Care         | Long-term Care          | Diagnostic Tests        | Physician Services      | Outpatient Drugs        |
| Esophagus      | 50,620<br>(47,677; 53,562) | 27,506<br>(25,314; 29,698) | 1,689<br>(1,609; 1,770) | 410<br>(373; 447) | 4,058<br>(3,806; 4,310) | 2,099<br>(687; 3,511)   | 694<br>(338; 1,050)     | 2,542<br>(2,408; 2,676) | 4,757<br>(4,567; 4,948) | 2,268<br>(2,137; 2,399) |
| Myeloma        | 45,185<br>(42,775; 47,596) | 19,844<br>(18,877; 20,810) | 494<br>(457; 532)       | 476<br>(445; 506) | 3,650<br>(3,448; 3,851) | 4,125<br>(2,364; 5,887) | 1,690<br>(1,209; 2,171) | 4,295<br>(4,100; 4,490) | 1,974<br>(1,881; 2,067) | 4,204<br>(3,998; 4,410) |
| Brain          | 43,815<br>(42,024; 45,607) | 19,282<br>(18,396; 20,168) | 118<br>(100; 136)       | 490<br>(456; 525) | 3,250<br>(2,981; 3,519) | 4,615<br>(3,553; 5,678) | 433<br>(234; 632)       | 2,076<br>(1,961; 2,190) | 4,945<br>(4,784; 5,106) | 5,046<br>(4,654; 5,439) |
| Pancreas       | 41,846<br>(40,290; 43,402) | 19,820<br>(18,813; 20,827) | 660<br>(605; 714)       | 471<br>(423; 518) | 3,350<br>(3,088; 3,612) | 1,011<br>(364; 1,659)   | 383<br>(161; 605)       | 2,690<br>(2,538; 2,841) | 3,812<br>(3,671; 3,954) | 2,147<br>(1,960; 2,335) |
| Gastric        | 39,795<br>(38,314; 41,275) | 20,457<br>(19,589; 21,325) | 1,004<br>(967; 1,042)   | 368<br>(339; 397) | 2,986<br>(2,828; 3,144) | 2,384<br>(1,536; 3,232) | 948<br>(645; 1,252)     | 2,391<br>(2,304; 2,478) | 3,620<br>(3,521; 3,719) | 1,663<br>(1,581; 1,745) |
| Colorectal     | 35,722<br>(35,158; 36,286) | 15,738<br>(15,566; 15,911) | 795<br>(782; 807)       | 286<br>(279; 292) | 2,679<br>(2,637; 2,720) | 2,902<br>(2,497; 3,307) | 1,798<br>(1,638; 1,957) | 1,985<br>(1,961; 2,008) | 3,040<br>(3,014; 3,066) | 1,296<br>(1,275; 1,317) |
| Liver          | 32,717<br>(30,591; 34,844) | 15,658<br>(14,218; 17,097) | 548<br>(494; 602)       | 412<br>(353; 472) | 1,642<br>(1,429; 1,856) | 1,076<br>(522; 1,631)   | 492<br>(170; 815)       | 6,564<br>(6,015; 7,114) | 3,754<br>(3,534; 3,975) | 2,289<br>(2,050; 2,528) |
| Lung           | 29,878<br>(29,386; 30,371) | 12,833<br>(12,571; 13,095) | 729<br>(714; 744)       | 331<br>(321; 342) | 2,205<br>(2,133; 2,278) | 1,470<br>(1,187; 1,753) | 677<br>(552; 803)       | 2,792<br>(2,746; 2,839) | 3,158<br>(3,114; 3,201) | 1,896<br>(1,855; 1,938) |
| Ovary          | 29,640<br>(28,538; 30,743) | 12,665<br>(12,259; 13,070) | 393<br>(364; 422)       | 267<br>(250; 285) | 2,566<br>(2,432; 2,699) | 1,458<br>(747; 2,169)   | 744<br>(460; 1,028)     | 2,210<br>(2,136; 2,283) | 2,290<br>(2,234; 2,346) | 1,265<br>(1,199; 1,331) |
| Leukemia       | 28,775<br>(27,426; 30,125) | 17,185<br>(16,343; 18,026) | 416<br>(387; 446)       | 263<br>(246; 281) | 1,038<br>(964; 1,113)   | 1,550<br>(798; 2,303)   | 816<br>(545; 1,086)     | 2,159<br>(2,089; 2,230) | 999<br>(957; 1,041)     | 3,195<br>(2,984; 3,406) |
| Other tumours  | 27,679<br>(26,876; 28,482) | 13,033<br>(12,687; 13,379) | 636<br>(619; 653)       | 255<br>(244; 265) | 2,097<br>(2,028; 2,165) | 1,881<br>(1,361; 2,401) | 1,045<br>(826; 1,265)   | 2,097<br>(2,050; 2,144) | 2,774<br>(2,724; 2,823) | 1,454<br>(1,373; 1,534) |
| Lymphoma       | 27,643<br>(26,727; 28,559) | 7,591<br>(7,201; 7,982)    | 906<br>(880; 932)       | 281<br>(267; 295) | 1,677<br>(1,602; 1,751) | 1,202<br>(638; 1,766)   | 651<br>(434; 868)       | 2,687<br>(2,618; 2,755) | 3,456<br>(3,401; 3,511) | 2,587<br>(2,469; 2,705) |
| Head and neck  | 27,527<br>(26,649; 28,404) | 11,055<br>(10,673; 11,437) | 770<br>(752; 789)       | 210<br>(199; 221) | 2,271<br>(2,182; 2,360) | 1,361<br>(814; 1,907)   | 568<br>(388; 748)       | 1,352<br>(1,311; 1,393) | 2,521<br>(2,459; 2,583) | 1,517<br>(1,467; 1,568) |
| Renal          | 21,312<br>(20,484; 22,140) | 11,523<br>(11,195; 11,851) | 323<br>(305; 342)       | 196<br>(186; 207) | 882<br>(820; 944)       | 1,217<br>(696; 1,739)   | 810<br>(571; 1,049)     | 2,634<br>(2,562; 2,705) | 2,464<br>(2,386; 2,543) | 1,025<br>(973; 1,076)   |
| Bladder        | 20,858<br>(20,040; 21,675) | 9,233<br>(8,934; 9,532)    | 1,700<br>(1,670; 1,730) | 220<br>(209; 232) | 1,278<br>(1,211; 1,344) | 1,469<br>(901; 2,036)   | 1,190<br>(917; 1,464)   | 1,883<br>(1,833; 1,932) | 1,865<br>(1,822; 1,908) | 1,184<br>(1,150; 1,217) |
| Female breast  | 20,227<br>(19,951; 20,503) | 3,977<br>(3,909; 4,046)    | 1,060<br>(1,049; 1,070) | 148<br>(145; 152) | 1,810<br>(1,783; 1,836) | 982<br>(786; 1,177)     | 741<br>(654; 828)       | 2,393<br>(2,373; 2,412) | 2,000<br>(1,985; 2,015) | 1,209<br>(1,191; 1,227) |
| Cervix         | 18,055<br>(17,305; 18,804) | 6,761<br>(6,400; 7,121)    | 539<br>(516; 562)       | 165<br>(150; 180) | 772<br>(692; 852)       | 480<br>(75; 884)        | 258<br>(79; 438)        | 1,365<br>(1,299; 1,431) | 2,955<br>(2,827; 3,084) | 488<br>(440; 536)       |
| Corpus uteri   | 16,823<br>(16,105; 17,540) | 7,577<br>(7,347; 7,806)    | 422<br>(409; 434)       | 121<br>(113; 129) | 962<br>(903; 1,021)     | 1,106<br>(600; 1,612)   | 913<br>(657; 1,169)     | 1,561<br>(1,520; 1,602) | 1,479<br>(1,447; 1,511) | 700<br>(674; 726)       |

|                    |                            |                         |                         |                   |                         |                         |                         |                         |                         |                         |
|--------------------|----------------------------|-------------------------|-------------------------|-------------------|-------------------------|-------------------------|-------------------------|-------------------------|-------------------------|-------------------------|
| Prostate           | 13,946<br>(13,731; 14,161) | 4,455<br>(4,393; 4,518) | 399<br>(393; 405)       | 116<br>(114; 119) | 504<br>(489; 519)       | 700<br>(550; 849)       | 551<br>(479; 624)       | 1,716<br>(1,699; 1,732) | 1,292<br>(1,280; 1,305) | 2,108<br>(2,085; 2,131) |
| Testis             | 13,763<br>(13,099; 14,426) | 4,219<br>(3,819; 4,620) | 617<br>(589; 644)       | 136<br>(121; 150) | 445<br>(381; 509)       | 60<br>(-22; 142)        | 76<br>(-14; 165)        | 1,634<br>(1,531; 1,736) | 2,959<br>(2,871; 3,048) | 576<br>(503; 649)       |
| Thyroid            | 11,372<br>(11,016; 11,728) | 6,273<br>(6,154; 6,393) | 182<br>(173; 191)       | 85<br>(79; 90)    | 188<br>(164; 212)       | 308<br>(69; 548)        | 145<br>(58; 232)        | 2,690<br>(2,634; 2,746) | 1,081<br>(1,060; 1,103) | 308<br>(286; 329)       |
| Melanoma           | 8,611<br>(8,221; 9,001)    | 1,911<br>(1,804; 2,019) | 634<br>(619; 649)       | 100<br>(95; 105)  | 686<br>(649; 724)       | 589<br>(319; 860)       | 450<br>(327; 573)       | 1,558<br>(1,525; 1,590) | 847<br>(822; 871)       | 881<br>(838; 925)       |
| <b>All Cancers</b> | 22,989<br>(22,841; 23,137) | 1,131<br>(1,122; 1,140) | 1,374<br>(1,364; 1,385) | 760<br>(748; 771) | 2,134<br>(2,116; 2,152) | 1,512<br>(1,500; 1,524) | 8,804<br>(8,746; 8,861) | 711<br>(706; 715)       | 200<br>(198; 202)       | 1,582<br>(1,569; 1,595) |

Legend: ED – emergency department

**Table C** – Mean (95% confidence interval) direct health care costs by tumour site for initial phase cancer patients who survived beyond the first year after diagnosis in 2009 Canadian dollars (cont.)

| Type of Cancer | Cancer-specific Care       |                         |                         |
|----------------|----------------------------|-------------------------|-------------------------|
|                | Total Cost                 | Chemotherapy            | Radiation Therapy       |
| Esophagus      | 50,620<br>(47,677; 53,562) | 2,502<br>(2,304; 2,700) | 2,093<br>(1,918; 2,268) |
| Myeloma        | 45,185<br>(42,775; 47,596) | 4,089<br>(3,913; 4,265) | 344<br>(311; 377)       |
| Brain          | 43,815<br>(42,024; 45,607) | 508<br>(470; 546)       | 3,051<br>(2,918; 3,184) |
| Pancreas       | 41,846<br>(40,290; 43,402) | 6,817<br>(6,426; 7,208) | 685<br>(604; 767)       |
| Gastric        | 39,795<br>(38,314; 41,275) | 2,984<br>(2,836; 3,133) | 989<br>(919; 1,059)     |
| Colorectal     | 35,722<br>(35,158; 36,286) | 4,571<br>(4,507; 4,635) | 633<br>(618; 648)       |
| Liver          | 32,717<br>(30,591; 34,844) | 221<br>(157; 284)       | 60<br>(30; 90)          |
| Ovary          | 29,878<br>(29,386; 30,371) | 5,688<br>(5,541; 5,836) | 94<br>(75; 112)         |
| Lung           | 29,640<br>(28,538; 30,743) | 2,699<br>(2,634; 2,763) | 1,087<br>(1,057; 1,117) |
| Head and neck  | 28,775<br>(27,426; 30,125) | 790<br>(734; 845)       | 5,112<br>(4,918; 5,305) |
| Lymphoma       | 27,679<br>(26,876; 28,482) | 5,882<br>(5,684; 6,080) | 723<br>(687; 758)       |
| Leukemia       | 27,643<br>(26,727; 28,559) | 1,107<br>(1,037; 1,178) | 47<br>(37; 57)          |
| Other tumours  | 27,527<br>(26,649; 28,404) | 1,280<br>(1,223; 1,337) | 1,129<br>(1,075; 1,183) |
| Bladder        | 21,312<br>(20,484; 22,140) | 550<br>(507; 593)       | 286<br>(261; 310)       |
| Female breast  | 20,858<br>(20,040; 21,675) | 3,340<br>(3,288; 3,393) | 2,568<br>(2,541; 2,596) |
| Renal          | 20,227<br>(19,951; 20,503) | 174<br>(147; 201)       | 63<br>(54; 73)          |
| Cervix         | 18,055<br>(17,305; 18,804) | 804<br>(760; 847)       | 3,468<br>(3,316; 3,620) |
| Corpus uteri   | 16,823<br>(16,105; 17,540) | 265<br>(241; 289)       | 1,717<br>(1,654; 1,779) |

|                    |                            |                         |                         |
|--------------------|----------------------------|-------------------------|-------------------------|
| Prostate           | 13,946<br>(13,731; 14,161) | 48<br>(44; 52)          | 2,055<br>(2,025; 2,086) |
| Testis             | 13,763<br>(13,099; 14,426) | 2,314<br>(2,164; 2,464) | 727<br>(675; 779)       |
| Thyroid            | 11,372<br>(11,016; 11,728) | 27<br>(17; 38)          | 84<br>(65; 103)         |
| Melanoma           | 8,611<br>(8,221; 9,001)    | 853<br>(801; 905)       | 101<br>(83; 120)        |
| <b>All Cancers</b> | 22,989<br>(22,841; 23,137) | 2,134<br>(2,116; 2,152) | 1,512<br>(1,500; 1,524) |

Legend: ED – emergency department



**Table D** – Mean (95% confidence interval) direct health care costs by tumour site for initial phase cancer patients who died within the first year after diagnosis in 2009 Canadian dollars

| Type of Cancer | Total Cost                  | Hospital-based Care        |                   |                     | Tertiary Care           |                          |                   | Other                   |                         |                         |
|----------------|-----------------------------|----------------------------|-------------------|---------------------|-------------------------|--------------------------|-------------------|-------------------------|-------------------------|-------------------------|
|                |                             | Inpatient Hospitalization  | Same-day Surgery  | ED Visits           | Home Care               | Continuing Care          | Long-term Care    | Diagnostic Tests        | Physician Services      | Outpatient Drugs        |
| Testis         | 81,655<br>(58,361; 104,949) | 55,771<br>(36,692; 74,851) | 520<br>(288; 753) | 845<br>(487; 1,202) | 2,687<br>(1,602; 3,773) | 1,712<br>(-1,599; 5,023) | -                 | 2,262<br>(1,185; 3,340) | 7,855<br>(5,880; 9,830) | 3,424<br>(1,936; 4,913) |
| Leukemia       | 60,615<br>(58,156; 63,073)  | 50,915<br>(48,633; 53,197) | 453<br>(381; 524) | 663<br>(607; 718)   | 1,922<br>(1,767; 2,077) | 1,081<br>(753; 1,410)    | 167<br>(95; 239)  | 1,066<br>(982; 1,150)   | 1,350<br>(1,255; 1,444) | 1,563<br>(1,358; 1,768) |
| Lymphoma       | 54,411<br>(52,139; 56,683)  | 37,693<br>(35,718; 39,668) | 468<br>(413; 523) | 742<br>(684; 801)   | 2,710<br>(2,476; 2,944) | 1,789<br>(1,324; 2,254)  | 195<br>(123; 267) | 1,649<br>(1,516; 1,781) | 3,138<br>(2,963; 3,313) | 2,124<br>(1,902; 2,346) |
| Brain          | 53,620<br>(52,257; 54,983)  | 33,085<br>(32,003; 34,168) | 76<br>(60; 92)    | 509<br>(476; 543)   | 3,964<br>(3,740; 4,188) | 7,045<br>(6,389; 7,702)  | 269<br>(205; 333) | 866<br>(796; 935)       | 3,571<br>(3,429; 3,712) | 2,192<br>(2,005; 2,380) |
| Myeloma        | 52,449<br>(49,867; 55,031)  | 35,978<br>(33,835; 38,121) | 314<br>(251; 377) | 727<br>(656; 798)   | 2,816<br>(2,503; 3,128) | 3,763<br>(2,731; 4,796)  | 593<br>(400; 786) | 2,053<br>(1,769; 2,338) | 2,049<br>(1,787; 2,311) | 2,169<br>(1,893; 2,446) |
| Head and neck  | 48,214<br>(46,411; 50,018)  | 29,701<br>(28,243; 31,158) | 453<br>(423; 483) | 495<br>(458; 533)   | 3,668<br>(3,456; 3,881) | 3,413<br>(2,839; 3,986)  | 218<br>(146; 290) | 852<br>(796; 909)       | 2,933<br>(2,806; 3,060) | 1,791<br>(1,683; 1,899) |
| Ovary          | 46,270<br>(44,452; 48,088)  | 29,854<br>(28,350; 31,359) | 315<br>(254; 375) | 547<br>(498; 595)   | 3,750<br>(3,448; 4,051) | 3,186<br>(2,526; 3,846)  | 143<br>(71; 214)  | 1,438<br>(1,313; 1,563) | 2,211<br>(2,078; 2,344) | 1,296<br>(1,176; 1,416) |
| Bladder        | 46,206<br>(44,460; 47,952)  | 31,844<br>(30,290; 33,399) | 595<br>(557; 633) | 590<br>(550; 630)   | 2,891<br>(2,710; 3,071) | 2,490<br>(2,037; 2,944)  | 461<br>(353; 568) | 1,575<br>(1,482; 1,669) | 3,168<br>(3,021; 3,314) | 1,189<br>(1,079; 1,299) |
| Colorectal     | 43,848<br>(43,070; 44,626)  | 29,261<br>(28,586; 29,937) | 397<br>(379; 415) | 488<br>(470; 505)   | 3,159<br>(3,062; 3,257) | 2,750<br>(2,522; 2,979)  | 344<br>(299; 388) | 1,186<br>(1,143; 1,229) | 2,852<br>(2,787; 2,917) | 1,171<br>(1,107; 1,234) |
| Esophagus      | 42,995<br>(41,400; 44,590)  | 26,701<br>(25,313; 28,088) | 884<br>(842; 925) | 520<br>(487; 552)   | 3,563<br>(3,360; 3,767) | 2,385<br>(1,994; 2,776)  | 133<br>(84; 182)  | 1,331<br>(1,239; 1,422) | 3,075<br>(2,930; 3,219) | 1,692<br>(1,585; 1,798) |
| Gastric        | 41,790<br>(40,468; 43,113)  | 28,346<br>(27,144; 29,547) | 591<br>(562; 620) | 526<br>(495; 557)   | 3,052<br>(2,914; 3,190) | 2,246<br>(1,940; 2,552)  | 151<br>(108; 193) | 1,188<br>(1,128; 1,249) | 2,642<br>(2,547; 2,736) | 1,352<br>(1,274; 1,430) |
| Cervix         | 41,536<br>(38,642; 44,429)  | 23,652<br>(21,553; 25,750) | 330<br>(261; 398) | 561<br>(480; 643)   | 3,253<br>(2,806; 3,700) | 2,698<br>(1,747; 3,649)  | 130<br>(25; 236)  | 1,450<br>(1,284; 1,616) | 3,515<br>(3,096; 3,935) | 1,784<br>(1,459; 2,109) |
| Renal          | 41,344<br>(39,542; 43,146)  | 26,847<br>(25,352; 28,343) | 233<br>(204; 263) | 591<br>(545; 636)   | 3,271<br>(3,004; 3,539) | 2,486<br>(1,999; 2,973)  | 131<br>(69; 194)  | 1,830<br>(1,693; 1,967) | 3,476<br>(3,250; 3,702) | 1,612<br>(1,381; 1,842) |
| Other tumours  | 40,094<br>(39,195; 40,992)  | 26,877<br>(26,096; 27,658) | 417<br>(397; 437) | 529<br>(507; 551)   | 3,174<br>(3,058; 3,291) | 2,142<br>(1,921; 2,362)  | 189<br>(150; 229) | 1,356<br>(1,299; 1,413) | 2,544<br>(2,466; 2,622) | 1,360<br>(1,288; 1,432) |
| Thyroid        | 39,265<br>(33,467; 45,064)  | 27,226<br>(22,094; 32,359) | 164<br>(96; 232)  | 505<br>(383; 628)   | 2,272<br>(1,695; 2,849) | 2,457<br>(1,119; 3,796)  | 26<br>(-11; 63)   | 1,385<br>(1,043; 1,727) | 2,514<br>(2,148; 2,880) | 1,200<br>(747; 1,653)   |
| Corpus uteri   | 36,685<br>(34,208; 39,162)  | 23,642<br>(21,482; 25,802) | 314<br>(270; 357) | 539<br>(471; 607)   | 2,801<br>(2,438; 3,164) | 2,679<br>(1,854; 3,504)  | 343<br>(165; 520) | 1,378<br>(1,233; 1,522) | 2,313<br>(2,099; 2,527) | 1,162<br>(1,009; 1,315) |
| Female breast  | 35,600<br>(34,351; 36,849)  | 19,440<br>(18,521; 20,359) | 493<br>(450; 536) | 490<br>(458; 522)   | 3,661<br>(3,424; 3,898) | 3,167<br>(2,604; 3,731)  | 488<br>(377; 599) | 1,648<br>(1,564; 1,732) | 1,960<br>(1,849; 2,071) | 1,490<br>(1,389; 1,591) |
| Pancreas       | 34,737<br>(33,969; 35,504)  | 21,222<br>(20,591; 21,852) | 491<br>(464; 518) | 551<br>(525; 577)   | 3,371<br>(3,236; 3,506) | 1,543<br>(1,343; 1,744)  | 47<br>(26; 69)    | 1,261<br>(1,199; 1,322) | 1,814<br>(1,747; 1,882) | 1,622<br>(1,532; 1,712) |

|                    |                            |                            |                   |                   |                         |                         |                   |                         |                         |                         |
|--------------------|----------------------------|----------------------------|-------------------|-------------------|-------------------------|-------------------------|-------------------|-------------------------|-------------------------|-------------------------|
| Prostate           | 33,667<br>(32,398; 34,936) | 19,968<br>(18,991; 20,944) | 317<br>(290; 344) | 527<br>(489; 566) | 2,205<br>(2,026; 2,384) | 3,273<br>(2,700; 3,846) | 580<br>(460; 700) | 1,553<br>(1,463; 1,643) | 1,527<br>(1,427; 1,627) | 3,008<br>(2,873; 3,143) |
| Lung               | 33,018<br>(32,660; 33,376) | 19,689<br>(19,392; 19,987) | 432<br>(422; 442) | 553<br>(541; 565) | 2,771<br>(2,716; 2,827) | 2,180<br>(2,067; 2,293) | 133<br>(116; 150) | 1,318<br>(1,290; 1,346) | 2,224<br>(2,188; 2,260) | 1,425<br>(1,387; 1,463) |
| Melanoma           | 32,160<br>(30,349; 33,970) | 18,215<br>(16,825; 19,605) | 483<br>(416; 550) | 528<br>(473; 583) | 3,177<br>(2,849; 3,505) | 2,206<br>(1,550; 2,861) | 230<br>(110; 351) | 1,545<br>(1,378; 1,712) | 2,759<br>(2,544; 2,973) | 1,470<br>(1,285; 1,656) |
| Liver              | 27,560<br>(25,747; 29,373) | 18,287<br>(16,676; 19,899) | 341<br>(294; 388) | 614<br>(552; 677) | 2,125<br>(1,918; 2,332) | 1,396<br>(1,030; 1,763) | 93<br>(35; 150)   | 1,821<br>(1,638; 2,003) | 1,657<br>(1,480; 1,835) | 896<br>(793; 1,000)     |
| <b>All Cancers</b> | 39,610<br>(39,350; 39,870) | 25,354<br>(25,131; 25,576) | 435<br>(428; 441) | 544<br>(537; 551) | 3,034<br>(3,000; 3,069) | 2,530<br>(2,454; 2,607) | 214<br>(202; 227) | 1,323<br>(1,307; 1,340) | 2,471<br>(2,448; 2,494) | 1,507<br>(1,484; 1,530) |

Legend: ED – emergency department

**Table D** – Mean (95% confidence interval) direct health care costs by tumour site for initial phase cancer patients who died within the first year after diagnosis in 2009 Canadian dollars (cont.)

| Type of Cancer | Total Cost                  | Cancer-specific Care    |                         |
|----------------|-----------------------------|-------------------------|-------------------------|
|                |                             | Chemotherapy            | Radiation Therapy       |
| Testis         | 81,655<br>(58,361; 104,949) | 6,374<br>(4,871; 7,878) | 203<br>(16; 391)        |
| Leukemia       | 60,615<br>(58,156; 63,073)  | 1,366<br>(1,246; 1,486) | 69<br>(49; 89)          |
| Lymphoma       | 54,411<br>(52,139; 56,683)  | 3,554<br>(3,199; 3,909) | 348<br>(262; 435)       |
| Brain          | 53,620<br>(52,257; 54,983)  | 148<br>(133; 164)       | 1,894<br>(1,797; 1,991) |
| Myeloma        | 52,449<br>(49,867; 55,031)  | 1,657<br>(1,448; 1,865) | 330<br>(283; 376)       |
| Head and neck  | 48,214<br>(46,411; 50,018)  | 652<br>(561; 743)       | 4,038<br>(3,720; 4,356) |
| Ovary          | 46,270<br>(44,452; 48,088)  | 3,496<br>(3,221; 3,772) | 35<br>(22; 47)          |
| Bladder        | 46,206<br>(44,460; 47,952)  | 893<br>(778; 1,008)     | 510<br>(452; 569)       |
| Colorectal     | 43,848<br>(43,070; 44,626)  | 1,990<br>(1,900; 2,081) | 249<br>(229; 269)       |
| Esophagus      | 42,995<br>(41,400; 44,590)  | 1,194<br>(1,098; 1,289) | 1,520<br>(1,414; 1,625) |
| Gastric        | 41,790<br>(40,468; 43,113)  | 1,321<br>(1,226; 1,415) | 376<br>(334; 419)       |
| Cervix         | 41,536<br>(38,642; 44,429)  | 1,114<br>(923; 1,305)   | 3,048<br>(2,630; 3,466) |
| Renal          | 41,344<br>(39,542; 43,146)  | 478<br>(405; 550)       | 389<br>(346; 431)       |
| Other tumours  | 40,094<br>(39,195; 40,992)  | 981<br>(918; 1,043)     | 525<br>(478; 573)       |
| Thyroid        | 39,265<br>(33,467; 45,064)  | 427<br>(238; 617)       | 1,088<br>(756; 1,420)   |
| Corpus uteri   | 36,685<br>(34,208; 39,162)  | 591<br>(455; 727)       | 925<br>(748; 1,102)     |
| Female breast  | 35,600<br>(34,351; 36,849)  | 1,967<br>(1,792; 2,143) | 796<br>(705; 886)       |
| Pancreas       | 34,737<br>(33,969; 35,504)  | 2,617<br>(2,482; 2,752) | 198<br>(174; 222)       |

|                    |                            |                         |                   |
|--------------------|----------------------------|-------------------------|-------------------|
| Prostate           | 33,667<br>(32,398; 34,936) | 211<br>(164; 257)       | 498<br>(425; 570) |
| Lung               | 33,018<br>(32,660; 33,376) | 1,486<br>(1,445; 1,527) | 807<br>(787; 826) |
| Melanoma           | 32,160<br>(30,349; 33,970) | 969<br>(773; 1,166)     | 578<br>(484; 672) |
| Liver              | 27,560<br>(25,747; 29,373) | 256<br>(200; 312)       | 72<br>(45; 99)    |
| <b>All Cancers</b> | 39,610<br>(39,350; 39,870) | 1,457<br>(1,432; 1,482) | 740<br>(724; 756) |

Legend: ED – emergency department
