# Supplementary material
Source: PubMed Central journal article supplement (PMC3985946)
Supplement: supp_1.1.E1_original-E1.pdf [file supp_1.1.E1_original-E1.pdf]

1  
2  
3 **ABSTRACT Word Count: 247**  
4

5 **Background:** The first year after cancer diagnosis is a period of intensive treatment and high  
6 cost. We estimate costs for the 21 most common cancers in Ontario in the year before and the  
7 first year after diagnosis.  
8

9  
10  
11 **Methods:** We selected patients diagnosed between 1997 and 2007 at  $\geq 19$  years of age, with valid  
12 ICD-O and histology codes, who survived  $>30$  days after diagnosis, and had no second cancer  
13 within 90 days of the initial cancer, from the Ontario Cancer Registry (N= 402,399). We used  
14 linked administrative data to calculate mean costs for each cancer during the pre- and post-  
15 diagnosis periods for short-term and long-term survivors (lived  $<1$  year and  $\geq 1$  year after  
16 diagnosis, respectively).  
17

18  
19  
20 **Results:** Pre-diagnosis costs were approximately \$6,604 for all cancer patients ranging from  
21 \$2,000 for testicular cancer to \$10,000 for liver cancer for long-term survivors and from  
22 approximately \$6,000 for brain cancer to \$11,000 for female breast cancer for short-term  
23 survivors. Average post-diagnosis costs for our cohort were about \$33,294; costs were lowest for  
24 thyroid cancer (under \$15,000) and highest for esophageal cancer (over \$50,000) for long-term  
25 survivors and ranged from \$28,000 for liver cancer to \$80,000 for testicular cancer for short-term  
26 survivors.  
27

28  
29  
30 **Interpretation:** Our research provides cancer-related cost estimates for the pre- and post-  
31 diagnosis phases and offers insight into the economic burden incurred by the Ontario health care  
32 system. These estimates can help inform policy makers' decisions regarding resource allocation  
33 for cancer prevention and control and serve as important input for economic evaluations.  
34  
35  
36  
37  
38  
39  
40  
41  
42  
43  
44  
45  
46  
47  
48  
49  
50  
51  
52  
53  
54  
55  
56  
57  
58  
59  
60

## BACKGROUND

Cancer is the leading cause of premature mortality, the second leading cause of death overall and the fourth leading cause of hospitalization<sup>1</sup> in Canada. The number of new cancer cases diagnosed annually in Ontario doubled from 30,337 in 1982 to 61,178 in 2006 (1), undoubtedly accompanied by an increase in the costs of cancer care. The most recent estimate of the total cost of cancer care in Canada is \$14.2 billion in 1998. Cancer care constitutes a large percentage of illness costs in Canada; it is the third most costly disease category, after cardiovascular and musculoskeletal diseases (2).

The first year after cancer diagnosis is a period of particularly high costs and intensive treatment (3, 4). Studies in the United States (US) have found that first year costs are highest for brain, pancreatic, esophageal, and gastric cancers, and lowest for melanoma of the skin, breast and prostate cancer (3). No comprehensive studies of pre- and post- diagnosis costs in Canada have been published. Also, few studies in any country have examined the costs of cancer treatment for patients under the age of 65 (5, 6).

Our objective was to estimate the pre- and post-diagnosis costs for patients diagnosed with the 21 most common cancers in Ontario between 1997 and 2007, and to understand the pattern of resource utilization. We used a large population-based sample of adult patients and rich administrative health care data. Our cost estimates will be of use for future economic evaluations, and for planning future health care budgets and setting priorities for resource allocation in cancer prevention and control.

---

<sup>1</sup> <http://www.phac-aspc.gc.ca/publicat/lcd-pcd97/index-eng.php>

## METHODS

We conducted a descriptive costing study evaluating all direct medical costs from the perspective of the payer, the Ontario Ministry of Health and Long-term Care. All costs were adjusted to 2009 Canadian dollars (10). Study approval was obtained from the Research Ethics Board at the University of Toronto.

Patients were identified from the Ontario Cancer Registry (OCR), the population-based cancer registry for Canada's largest province (7). We included patients who were 19 years of age or older at time of diagnosis and whose first diagnosis for a primary cancer occurred between January 1<sup>st</sup> 1997 and December 31<sup>st</sup> 2007. In addition, we selected patients who were assigned a single, valid International Classification of Diseases-Oncology topography code corresponding to a primary cancer diagnosis with no second cancer diagnosed within 90 days after the initial cancer diagnosis, and who survived more than 30 days after the initial diagnosis. We excluded all patients who had a cancer diagnosis recorded in the Ontario Health Insurance Plan (OHIP) database 180 days or more before the OCR diagnosis date.

We classified patients into one of the 21 most common cancer sites: brain, female breast, cervix, colorectal, corpus uteri, esophagus, gastric, head and neck, leukemia, liver, lung, lymphoma, melanoma, multiple myeloma, ovary, pancreas, prostate, renal, testis, thyroid and urinary bladder. A 22<sup>nd</sup> category consisted of all other tumour sites combined (see Appendix 1 for further details). When selecting our cohort, we identified some usual and/or incorrect histology codes

1  
2  
3 for some cancer sites. As a result, we selected the 20 most frequent histology codes for each  
4 cancer type. These codes were then reviewed by two practicing oncologists (K.C. and W.C.) to  
5 ensure that our cohort was representative of current clinical practice (see Appendix 1 for  
6 included histology codes by cancer site).  
7  
8  
9  
10  
11  
12  
13  
14

15 We used a phase-based approach (3, 8, 9) to examine the costs of care incurred before and after  
16 diagnosis. We divided each patient's observation time into two time periods based on date of  
17 diagnosis. The pre-diagnosis phase was defined as the 12 months before diagnosis. This phase is  
18 typically characterized by diagnostic testing to establish the cancer diagnosis. The second phase,  
19 the initial phase of care, was defined as the date of diagnosis and the subsequent 12 months. This  
20 is when patients receive primary treatment, and adjuvant/neoadjuvant therapy, if required.  
21  
22  
23  
24  
25  
26  
27  
28

29 Unfortunately, we do not have information on stage distribution at diagnosis for our cohort.

30  
31 Studies in the US have found that, within phase of care, net costs of care vary with stage at  
32 diagnosis, with costs generally higher for patients diagnosed with distant disease than for patients  
33 diagnosed with localized disease (3). Furthermore, most patients diagnosed at advanced stages  
34 generally live for a short period of time after diagnosis (3) We therefore stratified patients  
35 according to survival into short-term survivors (lived < 1 year after diagnosis) and long-term  
36 survivors (lived  $\geq 1$  year after diagnosis).  
37  
38  
39  
40  
41  
42  
43  
44  
45  
46  
47

48 All administrative databases were accessed through the Institute for Clinical Evaluative Sciences  
49 in Toronto, Ontario. Individual patient data were linked using Ontario Health Insurance Plan  
50 number and de-identified. We determined the utilization and costs of all resources used by  
51 patients (See Appendix 2 for details.)  
52  
53  
54  
55  
56  
57  
58  
59  
60

1  
2  
3  
4  
5  
6 We also calculated mean costs of care for the four major cancers (prostate, female breast, lung  
7  
8 and colorectal) by local health integration network (LHIN). Finally, we applied our overall  
9  
10 (unstratified) post-diagnosis cost estimates to the number of patients diagnosed with cancer in  
11  
12 2009 in Ontario to provide an estimate of the total economic burden incurred by the Ontario  
13  
14 health care system during the first year of treatment.  
15  
16  
17  
18  
19

## 20 RESULTS

21  
22 The final cohort consisted of 402,399 patients, with a mean age of 64 years at diagnosis.  
23  
24 Approximately 17.6% (N=70,809) were short-term survivors and 82.4% (N=331,590) were long-  
25  
26 term survivors. Table 1 provides the characteristics of our cohort. The most common sites were  
27  
28 prostate, female breast, colorectal and lung.  
29  
30  
31  
32  
33

34 The mean overall pre-diagnosis cost for our cohort was approximately \$6,604 while the mean  
35  
36 overall post-diagnosis cost in the year after treatment was \$33,294. Pre-diagnosis costs for long-  
37  
38 term survivors ranged from \$1,922 for testicular cancer to \$10,218 for liver cancer (Figure 1,  
39  
40 Appendix 3 Table 1A) ; for short term survivors, costs ranged from \$5,995 for brain cancer to  
41  
42 \$11,337 for breast cancer (Figure 2, Appendix 3 Table 2B). Among both groups of patients, the  
43  
44 pre-diagnosis costs were mainly due to hospitalization and diagnostic tests, which accounted for  
45  
46 approximately 50% of total costs (Appendix 3). Pre-diagnosis costs were approximately 20% of  
47  
48 first-year post-diagnosis costs. In general, pre-diagnosis costs were higher for short-term  
49  
50 survivors.  
51  
52  
53  
54  
55  
56  
57  
58  
59  
60

1  
2  
3 First-year post-diagnosis costs for long-term survivors were highest for esophageal cancer  
4 (\$54,445) (Figure 1, Appendix 3 Table 2A). Other cancers with high first-year mean costs  
5 included multiple myeloma (\$50,908), brain (\$46,428), and pancreatic (\$43,518) cancers (Figure  
6 1). Overall, the resource categories that contributed the most to these cancers were inpatient  
7 hospitalization (35%), chemotherapy (12%) and same-day surgery (9%). Thyroid, testis,  
8 melanoma, and prostate cancers exhibited the lowest mean first-year direct costs (from \$11,727  
9 for thyroid to \$15,646 for prostate). Among short-term survivors, the most expensive cancers in  
10 the post-diagnosis phase were testicular cancer (\$81,506) and leukemia (\$62,482), while liver  
11 cancer (\$28,209) was the least expensive (Figure 2, Appendix 3 Table 2B). The costliest  
12 resource during the post-diagnosis period for both groups of survivors was inpatient  
13 hospitalization (35% of total costs for long-term survivors and 62% for short-term survivors).  
14 The variation in costs was much greater for long-term survivors (factor of 5) than for short-term  
15 survivors (factor of about 3); lower variation among short-term survivors may be explained by  
16 the fact that most costs were associated with supportive care in hospitalized patients rather than  
17 curative surgical, radio- or chemotherapy.  
18  
19  
20  
21  
22  
23  
24  
25  
26  
27  
28  
29  
30  
31  
32  
33  
34  
35  
36  
37  
38  
39  
40

41 When comparing geographic variation in costs across local health integration networks, the  
42 variation in the mean first-year costs of care for prostate cancer was smaller than that observed in  
43 other cancer sites (Figure 3) (from < \$15,000 to \$15,000-\$19,999). We found greater cost  
44 variations between LHINs for breast, lung and colorectal cancers (Figure 3). In general, the  
45 larger and more northern LHINs (LHIN 14 - North West, LHIN 11 – Champlain, and, to a lesser  
46 extent, LHIN 13 - North East) had, on average, the highest first year costs, while the smaller  
47  
48  
49  
50  
51  
52  
53  
54  
55  
56  
57  
58  
59  
60

1  
2  
3 LHINs (LHIN 3 - Waterloo Wellington, except lung cancer, and LHIN 6 - Mississauga Halton)  
4  
5 had the lowest ones.  
6  
7  
8  
9

10 We also applied our overall post-diagnosis cost estimates to individuals diagnosed with cancer in  
11  
12 2009 to obtain an estimate of the total economic burden incurred by the Ontario health care  
13  
14 system during the first year of treatment (Table 2). We found that colorectal, prostate, lung and  
15  
16 breast cancers presented the largest financial burden for this period.  
17  
18  
19  
20

## 21 22 23 24 **DISCUSSION**

25  
26  
27 In our study, costs varied considerably between cancers. In the pre-diagnosis period, cancers  
28  
29 such as liver and pancreatic cancer, and multiple myeloma, which can present late, and are often  
30  
31 diagnosed during a hospitalization (12, 13, 14), are associated with higher costs. In the post-  
32  
33 diagnosis period, cancers with low 5-year relative survival (15), such as esophageal and  
34  
35 pancreatic cancers, and multiple myeloma, reported the highest costs of care for long-term  
36  
37 survivors. High costs were mainly due to hospitalizations (particularly cancer-related surgery and  
38  
39 stem-cell transplantation for multiple myeloma (14, 16)), chemotherapy and outpatient  
40  
41 prescription drugs. On the other hand, cancers with 5-year relative survival rates over 90% (11),  
42  
43 such as melanoma, thyroid and testicular cancers, presented the lowest costs of care. This was  
44  
45 not the case for short-term survivors where cancers affecting mostly younger patients, such as  
46  
47 testicular cancer and leukemia, and commonly treated more aggressively than other cancers (17),  
48  
49 presented high first-year costs.  
50  
51  
52  
53  
54  
55  
56  
57  
58  
59  
60

1  
2  
3 Our findings are generally concordant with research from the US (3, 18), which found that first-  
4 year net costs for patients aged 65 years and older were highest for brain and other nervous  
5 system cancers (\$65,409 for men and \$69,908 for women, 2004 USD), followed by pancreatic  
6 and esophageal cancers, and lowest for melanoma of the skin.  
7

8  
9  
10 We also examined costs for the top four cancers by LHIN and found that patients living in  
11 northern and larger LHINs had the highest costs. The explanation for variation in unadjusted  
12 costs is, at present, unclear. One potential explanation may be that patients in geographically  
13 remote regions may be diagnosed with cancer at later stages, thus requiring more aggressive and  
14 expensive treatment. In this first study, our aim was to simply describe health costs, and facilitate  
15 hypothesis generation for future studies; exploring causal relationships requires additional  
16 analysis.  
17  
18  
19  
20  
21  
22  
23  
24  
25  
26  
27  
28  
29  
30  
31  
32  
33

34 Our results provide some insight into the economic burden incurred by the Ontario health care  
35 system before diagnosis and during the first year of care. Applying the post-diagnosis cost  
36 estimates for long-term survivors to individuals diagnosed with cancer in 2009 provides a rough  
37 approximation of total economic burden incurred by the health care system during the first year  
38 of treatment. Our calculations suggest that the cancers with the largest financial burden during  
39 the first year post-diagnosis are colorectal, prostate, lung and breast cancers; this is due to  
40 underlying incidence, survival, and the magnitude of first-year cost estimates. If we extend these  
41 results to the Canadian population (assuming first-year costs are the same across all  
42 provinces/territories), we find that costs for the first year after diagnosis alone rise to \$538  
43 million, \$479 million, \$410 million and \$390 million for colorectal, lung, prostate and breast  
44  
45  
46  
47  
48  
49  
50  
51  
52  
53  
54  
55  
56  
57  
58  
59  
60



1  
2  
3 cancers, respectively. In 2009, Canada's gross domestic product (GDP) was about \$1.5 trillion<sup>2</sup>;  
4  
5 if our estimates are correct, first-year costs for these four cancers combined would have  
6  
7 represented about 0.12% of Canada's GDP in that year.  
8  
9

10  
11  
12 These estimates can also help inform future research funding priorities. In 2008, breast cancer,  
13  
14 leukemia and prostate cancer received the greatest share of site-specific research investment in  
15  
16 Canada in 2008 (\$62.4 million, \$24.3 million and \$21.2 million, respectively) while lung and  
17  
18 colorectal cancers were only allocated \$14.7 million and \$14.2 million, respectively (19). Our  
19  
20 analysis suggests that the latter present the highest economic burden (for the first year post-  
21  
22 diagnosis in Ontario), yet they are provided with relatively lower levels of research investment  
23  
24 (19). Thus, current research investment for these cancer sites is not commensurate with the  
25  
26 burden of disease.  
27  
28  
29  
30  
31

32  
33  
34 Fundamentally, our analysis is descriptive. As with the epidemiology of disease, description is  
35  
36 required to obtain a better understanding of a given disease and for hypothesis generation. Little  
37  
38 high quality descriptive work has been published regarding cancer costs in Canada. This type of  
39  
40 analysis is the first step toward understanding a major aspect of the burden of cancer and will be  
41  
42 useful for cost-effectiveness analysis and burden of illness studies. These data will also be highly  
43  
44 useful for administrators and health services researchers who fund, plan, provide, and evaluate  
45  
46 cancer services provided to Canadians.  
47  
48  
49  
50  
51

52  
53  
54  
55 <sup>2</sup> Statistics Canada. Table 384-0002 - Gross domestic product (GDP), expenditure-based, provincial economic  
56 accounts, annual (dollars), CANSIM (database).  
57 <http://www5.statcan.gc.ca/cansim/a26?lang=eng&retrLang=eng&id=3840002&paSer=&pattern=&stByVal=2&p1=-1&p2=37&tabMode=dataTable&csid=>  
58  
59  
60

## Strengths

Our study made use of rich administrative data and included a large population-based sample of all adults in the province of Ontario. Previous work has shown that cancer costs vary substantially by age (20) as younger patients may receive more aggressive therapy (17). Most studies that examine cancer costs are limited to patients 65 years and older; however, a significant number of cancer patients are between the ages of 50 and 64 (about 30% in Ontario) (1), and about 35% of our cohort. We provide cost estimates for cancers that have not been reported previously (3), such as multiple myeloma, and for cancers that are typically more common among younger adults, such as thyroid and testicular cancers.

Our costing methods were very detailed as we considered all resources paid for by the Ontario Ministry of Health under a comprehensive universal health care insurance plan; this has been done in the past for only a few, individual cancers (5). Furthermore, our study is the one of the few to use Ontario administrative data to cost cancer care and the only one, to our knowledge, to estimate pre-diagnosis and first-year post-diagnosis costs for all major cancers.

## Limitations

One potential limitation to our work is that we did not examine costs among children and adolescents; there is currently a lack of costs estimates for this group. Also, we were not able to present cost estimates by cancer stage as this information was not available from the OCR for the period of our study. Our analysis provides cost estimates for the 12 month pre-diagnosis and post-diagnosis periods only; future work includes the estimation of costs across all phases of care (initial, continuing and terminal phases of care). In our current estimates we did not consider date

1  
2  
3 of death, and thus we are likely including some costs associated with terminal/palliative care,  
4  
5 even for the long-term survivors. Finally, we provide cost estimates that included all health care  
6  
7 costs used to treat cancer patients, not net costs of care (i.e., the difference in costs between  
8  
9 cancer patients and control subjects); the latter are to be estimated in future work using a  
10  
11 matched case-control costing methodology (9; 17; 21).  
12  
13  
14  
15  
16

## 17 **Conclusions**

18  
19 In order to improve the quality and efficiency of care delivered to cancer patients, it is important  
20  
21 for health care providers to have a good understanding of the resources and costs associated with  
22  
23 diagnosis and treatment. Our research provides cancer-specific cost estimates for the pre- and  
24  
25 post-diagnosis phases; these can help inform policy makers' decisions regarding resource  
26  
27 allocation for cancer prevention and control and serve as an important input for economic  
28  
29 evaluations. In particular, our findings have been useful in flagging additional areas of interest,  
30  
31 such as potential geographic disparities in the cost of cancer care.  
32  
33  
34  
35  
36  
37  
38  
39  
40  
41  
42  
43  
44  
45  
46  
47  
48  
49  
50  
51  
52  
53  
54  
55  
56  
57  
58  
59  
60

1  
2  
3 **REFERENCES**  
4  
5  
6  
7

- 8 1. Cancer Care Ontario. Cancer in Ontario: Overview, A Statistical Report. Toronto,  
9 Canada, 2010.  
10  
11
- 12 2. Health Canada. Economic Burden of Illness in Canada. Ottawa: Health Canada, 1998.  
13  
14
- 15 3. Yabroff KR, Lamont EB, Mariotto A, Warren JL, Topor M, Meekins A, Brown ML. Cost  
16 of care for elderly cancer patients in the United States. J Natl Cancer Inst 2008.  
17 100(9):630-641.  
18  
19
- 20 4. Warren JL, Yabroff KR, Meekins A, Topor M, Lamont EB, Brown ML. Evaluation of  
21 Trends in the Cost of Initial Cancer Treatment. JNCI 2008. 100(12): 888-897.  
22  
23  
24  
25  
26  
27  
28
- 29 5. Krahn MD, Zagorski B, Laporte A, Alibhai SM, Bremner KE, Tomlinson G, Warde P,  
30 Naglie G. Healthcare costs associated with prostate cancer: estimates from a population-  
31 based study. BJU Int. 2010; 105(3): 338-346.  
32  
33  
34  
35  
36  
37  
38
- 39 6. Chang S, Long SR, Kutikova L, Bowman L, Finley D, Crown WH, Bennett CL.  
40 Estimating the Cost of Cancer: Results on the Basis of Claims Data Analyses for Cancer  
41 Patients Diagnosed with Seven Types of Cancer During 1999 to 2000. Journal of Clinical  
42 Oncology. 2004; 22(17): 3524-3530.  
43  
44  
45  
46  
47  
48  
49  
50  
51  
52  
53  
54  
55  
56  
57  
58  
59  
60

- 1  
2  
3  
4  
5  
6  
7  
8  
9  
10  
11  
12  
13  
14  
15  
16  
17  
18  
19  
20  
21  
22  
23  
24  
25  
26  
27  
28  
29  
30  
31  
32  
33  
34  
35  
36  
37  
38  
39  
40  
41  
42  
43  
44  
45  
46  
47  
48  
49  
50  
51  
52  
53  
54  
55  
56  
57  
58  
59  
60  
7. Hall S, Schulze K, Groome P, McKillop W, Holowaty E Using cancer registry data for survival studies: the example of the Ontario Cancer Registry. *J Clin Epidemiol*. 2006; 59:67-76.
8. Baker MS, Kessler LG, Urban N, et al: Estimating the treatment costs of breast and lung cancer. *Med Care* 29:40-49, 1991.
9. Brown ML, Riley GF, Potosky AL, Etzioni RD. Obtaining long-term disease specific costs of care: application to Medicare enrollees diagnosed with colorectal cancer. *Med Care* 1999. 37(12): 1249-59.
10. Statistics Canada, The Consumer Price Index, Catalogue no. 62-001-X, vol. 91, no. 1, 2012.
11. Canadian Cancer Society's Steering Committee on Cancer Statistics. *Canadian Cancer Statistics* 2011. Toronto, ON: Canadian Cancer Society; 2011.
12. El-Serag HB. Hepatocellular Carcinoma. *New England Journal of Medicine*. 2011. 365:1118-27.
13. Hidalgo M. Pancreatic Cancer. *New England Journal of Medicine*. 2010. 362:1605-17.

- 1  
2  
3 14. Palumbo A, Anderson K. Multiple Myeloma. *New England Journal of Medicine*. 2011.  
4  
5 364:1046-60.  
6  
7  
8  
9  
10 15. Cancer Care Ontario. *Cancer Fact: The most fatal cancers in Ontario*. April 2011.  
11  
12  
13  
14  
15 16. Enzinger PC, Mayer RJ. Esophageal Cancer. *New England Journal of Medicine*. 2003.  
16  
17 349:2241-52.  
18  
19  
20  
21  
22 17. Brown ML, Riley GF, Schussler N, Etzioni R. Estimating health care costs related to  
23  
24 cancer treatment from SEER-Medicare data. *Med Care*. 2002; 40(8 Suppl): IV-104-117.  
25  
26  
27  
28  
29 18. Cancer Trends Progress Report – 2009/2010 Update, National Cancer Institute, NIH,  
30  
31 DHHS, Bethesda, MD, April 2010, <http://progressreport.cancer.gov>.  
32  
33  
34  
35  
36 19. Canadian Cancer Research Alliance (2011). *Cancer Research Investment in Canada,*  
37  
38 *2008: The Canadian Cancer Research Alliance’s Survey of Government and Voluntary*  
39  
40 *Sector Investment in Cancer Research in 2008*. Toronto: CCRA.  
41  
42  
43  
44  
45 20. Brown ML, Lipscomb J, Snyder C. The burden of illness in cancer: economic cost and  
46  
47 quality of life. *Annu Rev Public Health* 2001; 22:91–113.  
48  
49  
50  
51  
52  
53  
54  
55  
56  
57  
58  
59  
60

- 1  
2  
3 21. Taplin SH, Barlow W, Urban N, Mandelson MT, Timlin DJ, Ichikawa L, Nefcy P. Stage,  
4  
5 age, comorbidity, and direct costs of colon, prostate, and breast cancer care. J Natl  
6  
7  
8 Cancer Inst.1995; 87(6):417-26.  
9  
10  
11  
12  
13  
14  
15  
16  
17  
18  
19  
20  
21  
22  
23  
24  
25  
26  
27  
28  
29  
30  
31  
32  
33  
34  
35  
36  
37  
38  
39  
40  
41  
42  
43  
44  
45  
46  
47  
48  
49  
50  
51  
52  
53  
54  
55  
56  
57  
58  
59  
60

Confidential

**Table 1** – Characteristics of cancer patients

| Characteristic                       | N (%)          |
|--------------------------------------|----------------|
| Overall sample                       | 402,399 (100)  |
| Type of Cancer                       |                |
| Prostate                             | 68,940 (17.1)  |
| Female breast                        | 68,709 (17.1)  |
| Colorectal                           | 58,659 (14.6)  |
| Lung                                 | 42,046 (10.4)  |
| Melanoma                             | 17,059 (4.2)   |
| Bladder                              | 12,580 (3.1)   |
| Head and neck                        | 12,462 (3.1)   |
| Corpus uteri                         | 12,352 (3.1)   |
| Thyroid                              | 11,448 (2.8)   |
| Lymphoma                             | 10,467 (2.6)   |
| Renal                                | 10,204 (2.5)   |
| Gastric                              | 8,107 (2.0)    |
| Leukemia                             | 8,052 (2.0)    |
| Ovary                                | 7,167 (1.8)    |
| Pancreas                             | 6,358 (1.6)    |
| Brain                                | 5,462 (1.4)    |
| Cervix                               | 4,819 (1.2)    |
| Esophagus                            | 4,349 (1.1)    |
| Myeloma                              | 4,315 (1.1)    |
| Testis                               | 3,054 (0.8)    |
| Liver                                | 2,640 (0.7)    |
| Other tumours                        | 23,150 (5.8)   |
| Age in years at diagnosis            |                |
| Mean (SD)                            | 63.5 (13.95)   |
| Median (IQR)                         | 65 (54-74)     |
| Sex                                  |                |
| Female                               | 196,017 (48.7) |
| Male                                 | 206,382 (51.3) |
| Neighbourhood income quintile        |                |
| Missing                              | 1,683 (0.4)    |
| 1 – Low                              | 75,662 (18.8)  |
| 2 – Medium-low                       | 81,882 (20.3)  |
| 3 – Medium                           | 79,363 (19.7)  |
| 4 – Medium-High                      | 79,577 (19.8)  |
| 5 - High                             | 84,232 (20.9)  |
| Rural residence                      | 59,648 (14.8)  |
| Residence in long-term care facility | 3,871 (1)      |

SD – standard deviation

IQR – interquartile range



**Table 2** – Total first-year cost estimates for selected cancers by sex for Ontario (in 2009 Canadian dollars)

|                      | <b>Number of Newly Diagnosed Cases (2009)</b> | <b>Mean Cost per Case (2009)</b> | <b>Total Cost (2009)</b> |
|----------------------|-----------------------------------------------|----------------------------------|--------------------------|
| Prostate             | 7,235                                         | \$25,054                         | \$181,265,690            |
| Breast               | 5,217                                         | \$30,180                         | \$157,449,060            |
| Colorectal           | 5,010                                         | \$41,170                         | \$206,261,700            |
| Lung                 | 4,867                                         | \$33,435                         | \$162,728,145            |
| Non-Hodgkin Lymphoma | 1,838                                         | \$43,646*                        | \$80,221,348             |
| Melanoma             | 1,490                                         | \$25,937                         | \$38,646,130             |
| Pancreas             | 746                                           | \$39,671                         | \$29,594,566             |
| Brain                | 695                                           | \$50,737                         | \$35,262,215             |

\* Mean cost estimate is for lymphoma (Hodgkin and non-Hodgkin)

Data Sources: Age-standardized incidence rates are from the Canadian Cancer Society (Canadian Cancer Statistics 2009); number of cases is based on population estimates from Statistics Canada (Catalogue no. 91-520-X).

Confidential

1  
2  
3  
4  
5  
6  
7  
8  
9  
10  
11  
12  
13  
14  
15  
16  
17  
18  
19  
20  
21  
22  
23  
24  
25  
26  
27  
28  
29  
30  
31  
32  
33  
34  
35  
36  
37  
38  
39  
40  
41  
42  
43  
44  
45  
46  
47  
48  
49

Figure 1 – Mean direct cost of cancer care for the first year before and after diagnosis by cancer site (long-term survivors)\*

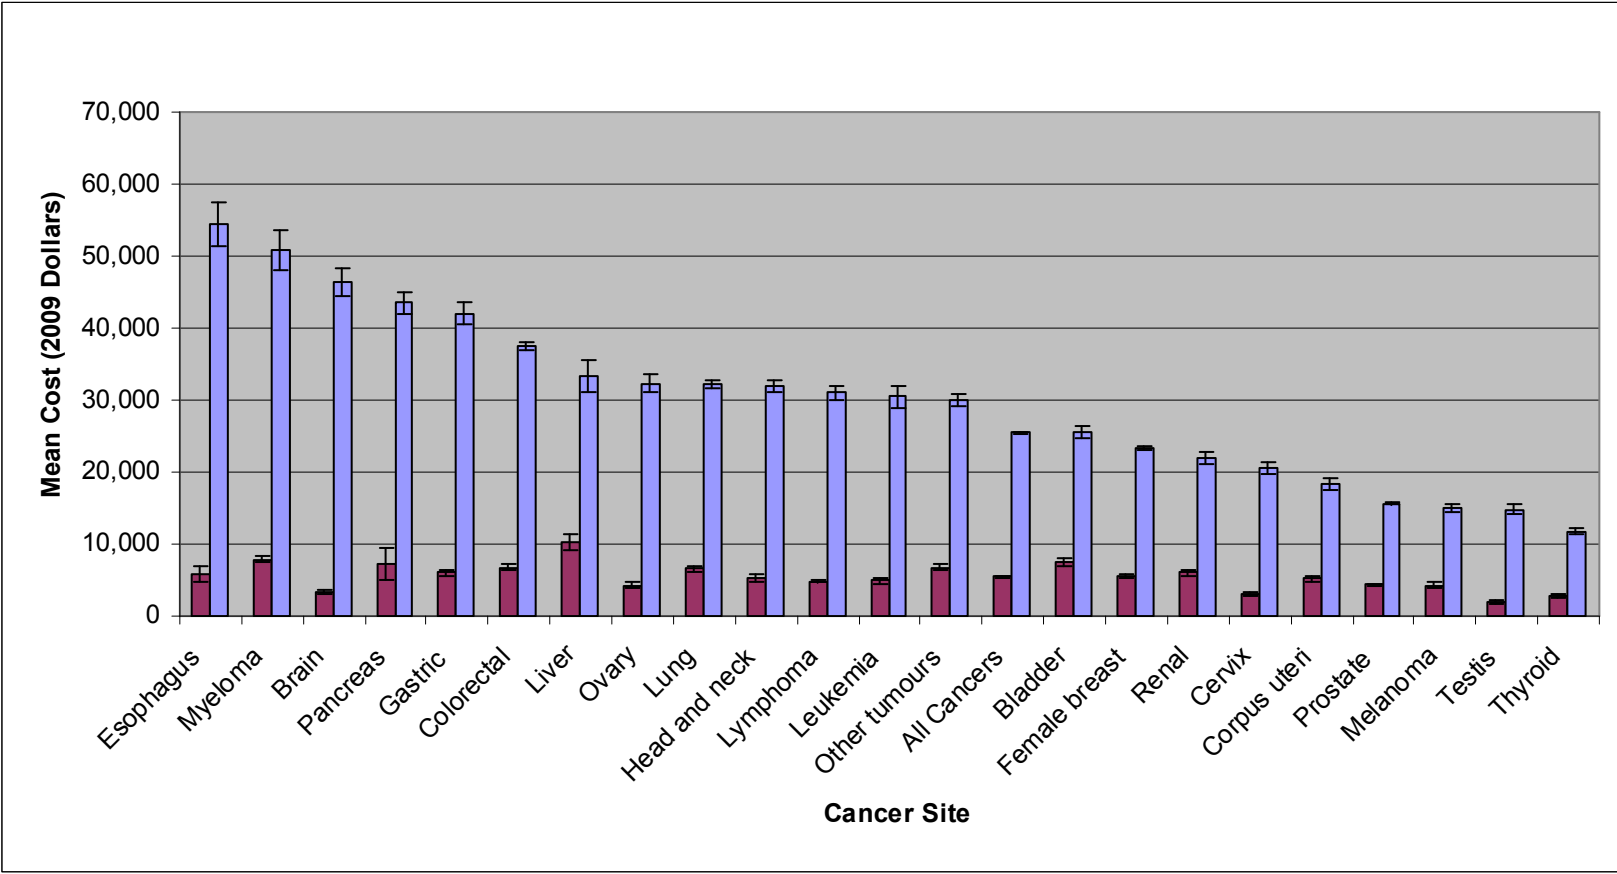

\*The pre-diagnosis phase of care is the last 12 months before diagnosis (in maroon). The initial phase of care is the first 12 months following diagnosis (in purple). Error bars are 95% confidence intervals. All estimates are in 2009 Canadian dollars. See Tables in Appendix 3 for more details.

Figure 2 – Mean direct cost of cancer care for the first year before and after diagnosis by cancer site (short-term survivors)\*

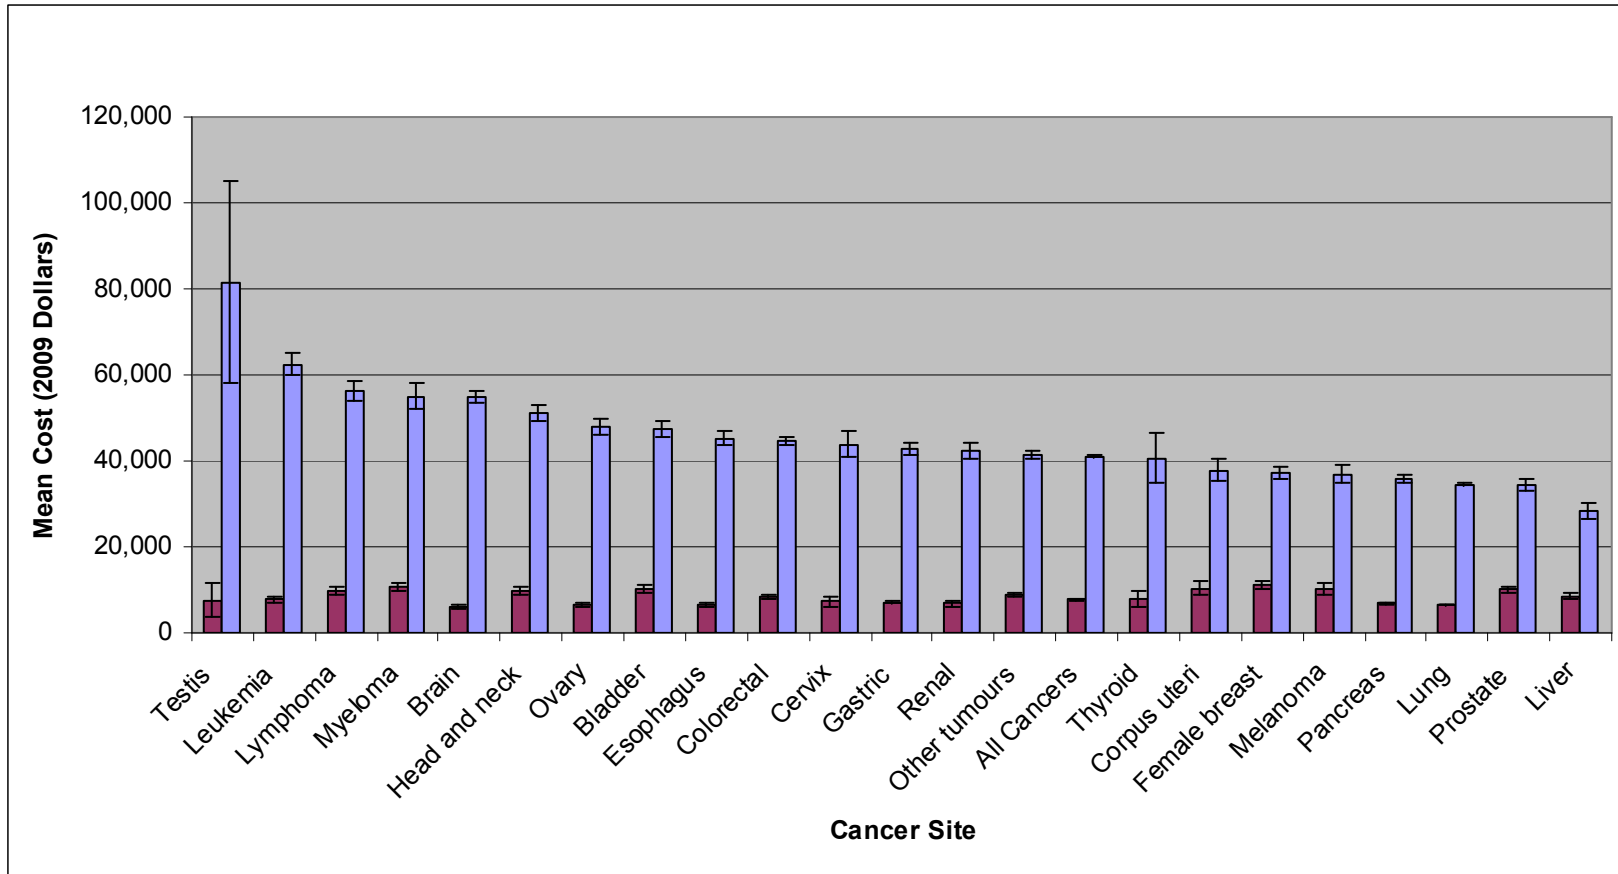

\*The pre-diagnosis phase of care is the last 12 months before diagnosis (in maroon). The initial phase of care is the first 12 months following diagnosis (in purple). Error bars are 95% confidence intervals. All estimates are in 2009 Canadian dollars. See Tables in Appendix 3 for more detail.

1  
2  
3  
4  
5  
6  
7  
8  
9  
10  
11  
12  
13  
14  
15  
16  
17  
18  
19  
20  
21  
22  
23  
24  
25  
26  
27  
28  
29  
30  
31  
32  
33  
34  
35  
36  
37  
38  
39  
40  
41  
42  
43  
44  
45  
46  
47  
48  
49

Figure 3 – Mean cost estimates for prostate, female breast, lung and colorectal cancers by LHIN

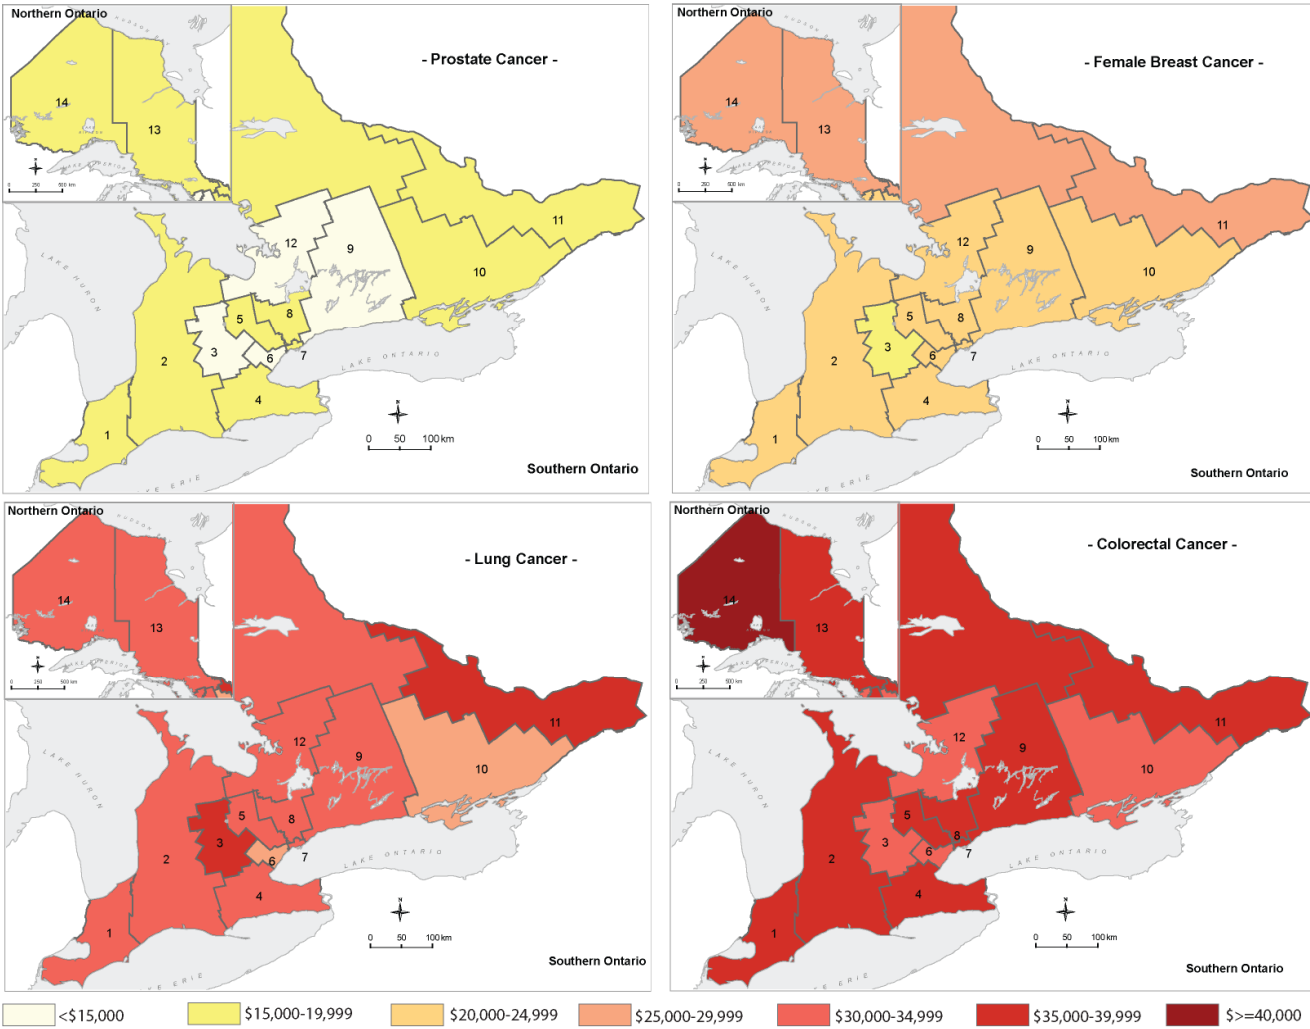

### Appendix 1 – Codes for cancer and histology

| Cancer        | ICD-O Code(s)                                    | Included Histologies                                                                                                            |
|---------------|--------------------------------------------------|---------------------------------------------------------------------------------------------------------------------------------|
| Head and neck | C00.* – C06.*,<br>C09.* – C14.*<br>C30.* – C32.* | 8004, 8010, 8011, 8020, 8041, 8042,<br>8051, 8070–8073, 8082, 8083, 8090,<br>8200, 8211, 8246, 8260, 8263, 8430                 |
| Esophagus     | C15.*                                            | 8000, 8010, 8012, 8020, 8041, 8046,<br>8070–8072, 8076, 8083, 8123, 8140,<br>8144, 8145, 8260, 8480, 8481, 8490,<br>8560        |
| Gastric       | C16.*                                            | 8000, 8010, 8020, 8070, 8071, 8140,<br>8142, 8144, 8145, 8210, 8211, 8240,<br>8246, 8255, 8260, 8263, 8480, 8481,<br>8490, 8560 |
| Colorectal    | C18.0, C18.2 – C18.9<br>C19.9<br>C20.9<br>C21.8  | 8000, 8010, 8020, 8070, 8140, 8144,<br>8210, 8211, 8221, 8240, 8246, 8260,<br>8261, 8262, 8263, 8310, 8480, 8481,<br>8490, 8510 |
| Liver         | C22.0                                            | 8000, 8001, 8010, 8012, 8020, 8033,<br>8170–8172, 8174, 8175, 8180, 8440                                                        |
| Pancreas      | C25.*                                            | 8000, 8001, 8010, 8012, 8020, 8041,<br>8046, 8140, 8150, 8240, 8246, 8260,<br>8440, 8470, 8480, 8481, 8490, 8500,<br>8550, 8560 |
| Lung          | C33.9<br>C34.*                                   | 8000, 8010, 8012, 8020, 8040, 8042,<br>8046, 8070–8072, 8140, 8240, 8246,<br>8250, 8255, 8260, 8480, 8481, 8550,<br>8560        |
| Melanoma      | C44.*                                            | 8720 – 8790<br>(with or without ICD-10 code C44.*)                                                                              |
| Female breast | C50.* (female)                                   | 8000, 8010, 8050, 8140, 8211, 8480,<br>8500, 8501, 8503, 8504, 8510, 8520–<br>8524, 8530, 8541, 8543, 8575                      |
| Corpus uteri  | C54.*                                            | 8000, 8010, 8020, 8050, 8070, 8072,<br>8140, 8210, 8260, 8263, 8310, 8323,<br>8380, 8441, 8460, 8461, 8480, 8481,<br>8560, 8570 |
| Cervix        | C53.*                                            | 8010, 8041, 8052, 8070–8072, 8076,<br>8100, 8140, 8246, 8260, 8263, 8310,<br>8380, 8384, 8460, 8480, 8481, 8560,<br>8570        |
| Ovary         | C56.9                                            | 8000, 8010, 8020, 8070, 8140, 8260,<br>8310, 8323, 8380, 8441, 8442, 8460–<br>8462, 8470, 8472, 8480, 8620, 9060,<br>9080       |
| Prostate      | C61.9                                            | 8000, 8010, 8041, 8046, 8070, 8130,<br>8140, 8145, 8201, 8255, 8260, 8310,<br>8340, 8341, 8380, 8480, 8481, 8490,<br>8500, 8550 |
| Bladder       | C67.*                                            | 8000, 8001, 8010, 8020, 8033, 8041,<br>8050, 8070, 8071, 8120, 8122, 8130,<br>8191, 8140, 8246, 8260, 8310, 8480,<br>8481, 8490 |

### Appendix 1 – Codes for cancer and histology (continued)

| Cancer             | ICD-O Code(s)                                                                                                                                                                                                                                                  | Included Histologies                                                                                                                                                                                                    |
|--------------------|----------------------------------------------------------------------------------------------------------------------------------------------------------------------------------------------------------------------------------------------------------------|-------------------------------------------------------------------------------------------------------------------------------------------------------------------------------------------------------------------------|
| Renal              | C64.9<br>C65.9                                                                                                                                                                                                                                                 | 8000, 8010, 8012, 8050, 8070, 8120,<br>8130, 8140, 8255, 8260, 8270, 8290,<br>8310, 8312, 8316–8320, 8323                                                                                                               |
| Brain              | C71.*                                                                                                                                                                                                                                                          | 8000, 8140, 9380, 9382, 9391, 9392,<br>9400, 9401, 9411, 9420, 9421, 9424,<br>9430, 9440–9442, 9450, 9451, 9470,<br>9573                                                                                                |
| Lymphoma           | C77.*                                                                                                                                                                                                                                                          | 9650–9667, 9590–9596, 9670, 9671,<br>9673, 9675, 9678–9680, 9684, 9687,<br>9689–9691, 9695, 9698–9702, 9705,<br>9708, 9709, 9714–9719, 9727–9729,<br>9823, 9827–9829                                                    |
| Multiple myeloma   | -                                                                                                                                                                                                                                                              | 9731, 9732, 9734                                                                                                                                                                                                        |
| Leukemia           | C42.*                                                                                                                                                                                                                                                          | 9733, 9742, 9800, 9801, 9805, 9820,<br>9823, 9826, 9827, 9831–9834, 9835–<br>9837, 9840, 9860, 9861, 9863, 9866,<br>9867, 9870–9876, 9891, 9895, 9897,<br>9910, 9920, 9930, 9931, 9940, 9945,<br>9946, 9948, 9963, 9964 |
| Thyroid            | C73.9                                                                                                                                                                                                                                                          | 8000, 8010, 8021, 8050, 8070, 8071,<br>8140, 8260, 8290, 8330, 8331, 8335,<br>8337, 8340–8344, 8350, 8510                                                                                                               |
| Testis             | C62.*                                                                                                                                                                                                                                                          | 8000, 8001, 8010, 8140, 8650, 8940,<br>9061, 9062–9065, 9070, 9071, 9080,<br>9081, 9083, 9085, 9100, 9101, 9364                                                                                                         |
| Other tumour sites | C07.* – C08.*<br>C17.*<br>C18.1<br>C22.1<br>C24.*<br>C26.0, C26.8 – C26.9<br>C37.9<br>C38.* - C41.*<br>C42.2, C42.3<br>C47.* - C49.*<br>C50.* (male)<br>C51.*<br>C52.9<br>C57.*<br>C58.9<br>C60.*<br>C63.*<br>C68.* – C70.*<br>C72.*<br>C74.* – C75.*<br>C80.9 | EXCLUDED:<br>9590 – 9989 Leukemia, lymphoma<br>and multiple myeloma                                                                                                                                                     |

Legend: ICD-O – International Classification of Disease-Oncology

## Appendix 2– Costing Methodology

The number of chemotherapy visits was obtained from the National Ambulatory Care Reporting System (NACRS) from 2003 onwards and from physicians' billings for chemotherapy injections in the Claims History Database of the Ontario Health Insurance Plan (OHIP) before 2003. The cost of chemotherapy visits (including the cost of the drugs administered) was estimated from the NACRS using the Resource Intensity Weight (RIW) method (1-3). The RIWs are index number values calculated by the Canadian Institute for Health Information (CIHI) (<http://www.cihi.ca>); they are estimated annually and represent the relative cost of patient types. We multiplied the RIW associated with each chemotherapy visit by the average provincial cost per weighted case to obtain the total cost. The average cost per visit in 2003 was then used to estimate the costs of all visits identified in the OHIP data for the pre-2003 period. In addition, we obtained the dosage and cost of chemotherapy drugs paid under the New Drug Funding Program (NDFP) from data obtained from Cancer Care Ontario. This program funds new and approved intravenous cancer drugs administered in hospitals and cancer centres.

We obtained data on radiation therapy from the Activity Level Reporting data<sup>3</sup> from Cancer Care Ontario (<http://cancercare.on.ca>). We used the National Hospital Productivity Improvement Project (NHPIP) code assigned to each fraction of radiation therapy to cost radiation therapy. We obtained the cost per NHPIP unit (\$8.03 in 1995/96) from published Ontario data (4). This value includes salaries and benefits for secretaries, nurses, physicists, therapists; the cost of equipment (machines and cobalt source); the cost of supplies (medical/surgical, administration, physics, radiotherapy, planning CTs) and services (linens, lab, transcription, health information services, nutrition, clinics, department costs, offset revenues).

We obtained the number of diagnostic tests and their respective cost from the OHIP data. We divided the cost into technical and professional components. The technical component was included in the cost of diagnostic tests while the professional component was included in the cost incurred with physician services.

Individuals aged 65 years and older, long-term care residents, individuals receiving home care and other selected groups are eligible for prescription drug coverage under the Ontario Drug Benefit (ODB) Plan ([http://www.health.gov.on.ca/english/public/program/drugs/drugs\\_mn.html](http://www.health.gov.on.ca/english/public/program/drugs/drugs_mn.html)). We estimated the quantity and cost of outpatient prescription drugs for patients 65 years of age and older from the ODB Plan records.

We used the Discharge Abstract Database (DAD), which contains demographic, administrative and clinical data on acute care institution separations (discharges, deaths,

---

<sup>3</sup> This includes all activity occurring at the former Regional Cancer Centres in Ontario. Princess Margaret Hospital data to be introduced during fiscal year 2005/06 (Ontario Health Planning Data Guide – Release 3.0, 2006).

1  
2  
3 sign-outs, transfers) across Canada, to determine the frequency and type of inpatient  
4 hospitalizations. Costs were estimated using the RIW method (1-3).  
5  
6

7 The NACRS contains administrative, clinical, financial, and demographic data for  
8 hospital-based ambulatory care, including same day surgery (SDS), emergency  
9 department (ED) visits, medical day/night care, and high-cost ambulatory clinics, and is  
10 available from 2002/03 onwards. For the pre-NACRS period, the number of SDS was  
11 determined from the DAD while the number of ED visits was estimated from the OHIP  
12 claims history database. The RIW methodology was employed to determine the costs for  
13 SDS visits identified before 2002 (1-3). For ED visits prior to 2002 we applied the  
14 average 2002 cost.  
15  
16

17 Various funded services are available to individuals requiring care at home in Ontario  
18 ([http://www.health.gov.on.ca/english/public/program/ltc/8\\_home\\_comm\\_mn.html](http://www.health.gov.on.ca/english/public/program/ltc/8_home_comm_mn.html)),  
19 including professionals (e.g. nurses, physiotherapists), and personal, homemaking and  
20 community support. We estimated the frequency, length of stay and type of home care  
21 service from the Ontario Home Care Administrative System (pre-April 2005) and the  
22 Home Care Database (post-April 2005). Unit costs were obtained from the Community  
23 Care Access Centres, Toronto (5).  
24  
25  
26

27 Complex continuing care (CCC) includes medical long-term care, geriatric assessment  
28 and rehabilitation, psychogeriatric care, palliative care, and respite care. The frequency  
29 and length of stay in a CCC facility were obtained from the Continuing Care Reporting  
30 System data. We estimated the cost of each stay by multiplying the length of stay in days  
31 by the average case mix index (a diagnosis-related group weight) per patient-stay and the  
32 cost per weighted day for chronic care (5).  
33  
34

35 We estimated the time spent in long-term care (LTC) facilities using the LTC flag in the  
36 Ontario Drug Benefit Plan database. We dated the onset of LTC from the first of three  
37 consecutive LTC-flagged drug claims and dated the cessation of LTC from the first of  
38 three consecutive non-LTC flagged drug claims to obtain the length of stay. The costs  
39 associated with nursing, food and programming for LTC residents are covered by the  
40 Ministry of Health and Long-term Care (<http://www.health.gov.on.ca/>) (5).  
41  
42  
43

44 Finally, the number of all physician services and respective payments were estimated  
45 from the claims history database of the OHIP.  
46

47 We used the health care component of the Statistics Canada Consumer Price Index for  
48 Ontario to adjust for inflation and reported all costs in 2009 Canadian dollars.  
49  
50  
51  
52  
53  
54  
55  
56  
57  
58  
59  
60



**REFERENCES**

1. Canadian Coordinating Office for Health Technology Assessment. A Guidance Document for the Costing Process, Version 1.0. Ottawa: CADTH, 1996.
2. Canadian Institute of Health Information. Resource Intensity Weights. Summary of Methodology 1995/96. Ottawa: The Institute; 1995: 1–75.
3. Pink GH, Bolley HB. Physicians in health care management: 3: case mix groups and resource intensity weights: an overview for physicians. *Can Med Assoc J* 1994; 150: 889–94.
4. Earle C, Coyle D, Smith A, Agboola O, Evans WK. The cost of radiotherapy at an Ontario Regional cancer centre: a reevaluation. *Crit Rev Oncol Hemat* 1999; 32: 87–93.
5. Wodchis WP, Bushmeneva K, Nikitovic M, McKillop I. Guidelines on Person-Level Costing Using Administrative Databases in Ontario. Toronto: Health System Performance Research Network; 2011.

1  
2  
3  
4  
5  
6  
7  
8  
9  
10  
11  
12  
13  
14  
15  
16  
17  
18  
19  
20  
21  
22  
23  
24  
25  
26  
27  
28  
29  
30  
31  
32  
33  
34  
35  
36  
37  
38  
39  
40  
41  
42  
43  
44  
45  
46  
47  
48  
49

### Appendix 3 – Supplementary Tables

**Table 1. A** – Mean (95% confidence interval) direct healthcare costs by tumour site and resource for pre-diagnosis phase for cancer patients that live beyond the first year post-diagnosis (long-term survivors) in 2009 Canadian dollars

| Type of Cancer | Total Cost                | Hospital-based Care       |                        |                   | Tertiary Care     |                      |                         | Other                   |                    |                     |
|----------------|---------------------------|---------------------------|------------------------|-------------------|-------------------|----------------------|-------------------------|-------------------------|--------------------|---------------------|
|                |                           | Inpatient Hospitalization | Same-day Surgery       | ED Visits         | Home Care         | Continuing Care      | Long-term Care          | Diagnostic Tests        | Physician Services | Outpatient Drugs    |
| Liver          | 10,218<br>(9,157; 11,279) | 3,190<br>(2,528; 3,852)   | 1,039<br>(752; 1,327)  | 251<br>(205; 297) | 372<br>(251; 494) | 205<br>(-178; 587)   | 268<br>(21; 515)        | 3,811<br>(3,591; 4,032) | 149<br>(104; 194)  | 933<br>(808; 1,058) |
| Myeloma        | 7,916<br>(7,447; 8,384)   | 1,687<br>(1,485; 1,890)   | 466<br>(349; 584)      | 187<br>(172; 202) | 302<br>(243; 361) | 109<br>(30; 188)     | 576<br>(259; 892)       | 3,720<br>(3,583; 3,856) | 103<br>(83; 123)   | 766<br>(716; 817)   |
| Bladder        | 7,438<br>(6,870; 8,007)   | 1,257<br>(1,170; 1,345)   | 893<br>(777; 1,010)    | 106<br>(100; 113) | 317<br>(278; 355) | 493<br>(130; 856)    | 1,444<br>(1,149; 1,739) | 1,948<br>(1,904; 1,991) | 108<br>(100; 116)  | 873<br>(847; 899)   |
| Pancreas       | 7,140<br>(4,885; 9,394)   | 1,557<br>(1,338; 1,776)   | 1,847<br>(-368; 4,062) | 197<br>(176; 219) | 100<br>(67; 133)  | 52<br>(-14; 119)     | 132<br>(-34; 297)       | 2,545<br>(2,431; 2,659) | 79<br>(62; 96)     | 631<br>(569; 694)   |
| Colorectal     | 6,804<br>(6,479; 7,130)   | 1,186<br>(1,140; 1,231)   | 585<br>(543; 628)      | 115<br>(112; 118) | 281<br>(266; 297) | 674<br>(449; 899)    | 1,343<br>(1,192; 1,494) | 1,825<br>(1,805; 1,845) | 82<br>(78; 87)     | 713<br>(701; 725)   |
| Other tumours  | 6,741<br>(6,327; 7,156)   | 1,497<br>(1,412; 1,581)   | 829<br>(736; 921)      | 136<br>(127; 145) | 298<br>(268; 327) | 320<br>(59; 581)     | 994<br>(779; 1,210)     | 1,919<br>(1,880; 1,958) | 96<br>(89; 103)    | 653<br>(633; 674)   |
| Lung           | 6,585<br>(6,236; 6,935)   | 1,401<br>(1,310; 1,492)   | 763<br>(689; 836)      | 127<br>(122; 133) | 279<br>(254; 305) | 289<br>(34; 544)     | 408<br>(299; 518)       | 2,331<br>(2,295; 2,368) | 99<br>(93; 106)    | 887<br>(865; 909)   |
| Gastric        | 5,988<br>(5,531; 6,446)   | 1,327<br>(1,161; 1,493)   | 596<br>(474; 717)      | 122<br>(111; 132) | 274<br>(219; 329) | 159<br>(-78; 397)    | 486<br>(254; 718)       | 2,134<br>(2,060; 2,209) | 91<br>(77; 106)    | 798<br>(755; 841)   |
| Renal          | 5,986<br>(5,609; 6,362)   | 1,210<br>(1,111; 1,308)   | 650<br>(549; 752)      | 149<br>(141; 158) | 197<br>(168; 226) | 115<br>(-52; 282)    | 382<br>(129; 635)       | 2,498<br>(2,435; 2,561) | 103<br>(94; 113)   | 681<br>(652; 711)   |
| Esophagus      | 5,925<br>(4,833; 7,018)   | 1,288<br>(1,058; 1,517)   | 755<br>(513; 996)      | 95<br>(81; 109)   | 209<br>(136; 281) | 656<br>(-234; 1,546) | 387<br>(70; 704)        | 1,639<br>(1,542; 1,735) | 115<br>(85; 145)   | 782<br>(720; 844)   |
| Female breast  | 5,461<br>(5,184; 5,739)   | 499<br>(474; 524)         | 388<br>(358; 418)      | 43<br>(42; 45)    | 234<br>(221; 246) | 515<br>(327; 704)    | 1,642<br>(1,494; 1,790) | 1,611<br>(1,595; 1,627) | 46<br>(44; 48)     | 482<br>(473; 490)   |
| Head and neck  | 5,295<br>(4,772; 5,818)   | 844<br>(734; 954)         | 671<br>(549; 794)      | 73<br>(68; 79)    | 220<br>(188; 251) | 487<br>(147; 828)    | 981<br>(726; 1,237)     | 1,342<br>(1,301; 1,383) | 71<br>(64; 78)     | 606<br>(580; 633)   |
| Corpus uteri   | 5,145<br>(4,729; 5,561)   | 534<br>(472; 595)         | 450<br>(392; 507)      | 59<br>(55; 63)    | 254<br>(221; 288) | 250<br>(36; 463)     | 1,106<br>(810; 1,402)   | 1,913<br>(1,873; 1,954) | 61<br>(54; 67)     | 519<br>(499; 540)   |
| Leukemia       | 4,963<br>(4,540; 5,386)   | 752<br>(664; 839)         | 447<br>(321; 573)      | 98<br>(89; 108)   | 184<br>(145; 222) | 190<br>(4; 376)      | 632<br>(360; 904)       | 2,029<br>(1,970; 2,088) | 53<br>(46; 61)     | 578<br>(539; 617)   |
| Lymphoma       | 4,838<br>(4,602; 5,075)   | 975<br>(881; 1,070)       | 594<br>(492; 696)      | 127<br>(119; 135) | 167<br>(140; 194) | 26<br>(1; 51)        | 275<br>(139; 412)       | 2,116<br>(2,054; 2,177) | 72<br>(62; 83)     | 485<br>(454; 517)   |
| Prostate       | 4,352<br>(4,185; 4,519)   | 665<br>(638; 692)         | 502<br>(461; 542)      | 57<br>(55; 59)    | 123<br>(115; 132) | 200<br>(92; 308)     | 528<br>(445; 611)       | 1,580<br>(1,565; 1,596) | 63<br>(60; 65)     | 634<br>(625; 643)   |
| Ovary          | 4,279<br>(3,926; 4,633)   | 648<br>(579; 718)         | 496<br>(281; 710)      | 109<br>(101; 117) | 154<br>(120; 188) | 26<br>(-6; 58)       | 293<br>(56; 530)        | 2,097<br>(2,033; 2,161) | 49<br>(43; 55)     | 408<br>(383; 432)   |

|                    |                         |                         |                   |                   |                   |                   |                     |                         |                |                   |
|--------------------|-------------------------|-------------------------|-------------------|-------------------|-------------------|-------------------|---------------------|-------------------------|----------------|-------------------|
| Melanoma           | 4,239<br>(3,827; 4,652) | 566<br>(518; 614)       | 507<br>(421; 593) | 51<br>(47; 54)    | 177<br>(152; 202) | 376<br>(101; 651) | 929<br>(726; 1,133) | 1,121<br>(1,091; 1,150) | 54<br>(49; 58) | 459<br>(441; 478) |
| Thyroid            | 3,866<br>(3,578; 4,154) | 478<br>(431; 524)       | 296<br>(239; 353) | 52<br>(48; 56)    | 59<br>(43; 74)    | 154<br>(-87; 395) | 98<br>(-5; 200)     | 2,463<br>(2,411; 2,515) | 64<br>(58; 70) | 203<br>(187; 218) |
| Brain              | 3,420<br>(3,175; 3,666) | 1,311<br>(1,165; 1,456) | 249<br>(129; 370) | 235<br>(216; 253) | 60<br>(25; 94)    | 11<br>(-3; 25)    | 34<br>(-33; 101)    | 1,284<br>(1,211; 1,357) | 55<br>(43; 68) | 182<br>(155; 209) |
| Cervix             | 3,019<br>(2,695; 3,343) | 446<br>(377; 515)       | 265<br>(215; 315) | 67<br>(59; 75)    | 126<br>(90; 162)  | 43<br>(-20; 105)  | 362<br>(99; 625)    | 1,419<br>(1,360; 1,479) | 49<br>(41; 56) | 242<br>(214; 271) |
| Testis             | 1,922<br>(1,580; 2,263) | 240<br>(175; 305)       | 211<br>(113; 310) | 69<br>(61; 77)    | 29<br>(4; 55)     | -                 | 156<br>(-150; 462)  | 1,117<br>(1,061; 1,173) | 17<br>(12; 22) | 82<br>(57; 107)   |
| <b>All Cancers</b> | 5,451<br>(5,354; 5,547) | 864<br>(849; 879)       | 542<br>(521; 563) | 84<br>(83; 85)    | 210<br>(204; 215) | 357<br>(293; 420) | 930<br>(882; 979)   | 1,800<br>(1,792; 1,808) | 69<br>(68; 71) | 594<br>(590; 599) |

Data sources: Ontario Cancer Registry, Cancer Care Ontario and administrative health data housed at the Institute for Clinical Evaluative Sciences (mean direct costs by phase of care).

Legend: ED – emergency department

1  
2  
3  
4  
5  
6  
7  
8  
9  
10  
11  
12  
13  
14  
15  
16  
17  
18  
19  
20  
21  
22  
23  
24  
25  
26  
27  
28  
29  
30  
31  
32  
33  
34  
35  
36  
37  
38  
39  
40  
41  
42  
43  
44  
45  
46  
47  
48  
49

**Table 1. B** – Mean (95% confidence interval) direct healthcare costs by tumour site and resource for pre-diagnosis phase for cancer patients that do **not** live beyond the first year post-diagnosis (short-term survivors) in 2009 Canadian dollars

| Type of Cancer | Total Cost                 | Hospital-based Care       |                       |                   | Tertiary Care           |                      |                         | Other                    |                    |                         |
|----------------|----------------------------|---------------------------|-----------------------|-------------------|-------------------------|----------------------|-------------------------|--------------------------|--------------------|-------------------------|
|                |                            | Inpatient Hospitalization | Same-day Surgery      | ED Visits         | Home Care               | Continuing Care      | Long-term Care          | Diagnostic Tests         | Physician Services | Outpatient Drugs        |
| Female breast  | 11,337<br>(10,405; 12,268) | 1,672<br>(1,404; 1,941)   | 558<br>(308; 808)     | 138<br>(120; 156) | 1,425<br>(1,237; 1,613) | 901<br>(407; 1,394)  | 3,634<br>(3,115; 4,153) | 1,7730<br>(1,670; 1,876) | 71<br>(56; 87)     | 1,165<br>(1,091; 1,238) |
| Myeloma        | 10,683<br>(9,674; 11,691)  | 3,176<br>(2,659; 3,694)   | 756<br>(316; 1,197)   | 330<br>(287; 374) | 807<br>(606; 1,008)     | 349<br>(63; 634)     | 609<br>(301; 916)       | 3,395<br>(3,145; 3,646)  | 142<br>(98; 185)   | 1,118<br>(1,021; 1,216) |
| Corpus uteri   | 10,447<br>(8,872; 12,022)  | 1,957<br>(1,375; 2,538)   | 505<br>(68; 942)      | 199<br>(157; 241) | 1,509<br>(1,128; 1,890) | 543<br>(-109; 1,195) | 2,405<br>(1,611; 3,200) | 2,100<br>(1,913; 2,287)  | 94<br>(62; 126)    | 1,135<br>(1,023; 1,247) |
| Melanoma       | 10,267<br>(8,875; 11,659)  | 2,437<br>(1,803; 3,071)   | 573<br>(265; 881)     | 152<br>(119; 185) | 1,284<br>(967; 1,602)   | 353<br>(-213; 920)   | 2,515<br>(1,768; 3,262) | 1,746<br>(1,574; 1,917)  | 108<br>(75; 140)   | 1,099<br>(973; 1,224)   |
| Bladder        | 10,223<br>(9,462; 10,983)  | 2,612<br>(2,180; 3,045)   | 754<br>(522; 985)     | 205<br>(183; 226) | 1,145<br>(985; 1,305)   | 373<br>(135; 611)    | 1,777<br>(1,420; 2,134) | 1,982<br>(1,889; 2,074)  | 131<br>(108; 155)  | 1,244<br>(1,178; 1,309) |
| Prostate       | 10,084<br>(9,279; 10,888)  | 2,823<br>(2,476; 3,169)   | 768<br>(347; 1,189)   | 187<br>(164; 209) | 1,074<br>(901; 1,246)   | 357<br>(121; 594)    | 1,411<br>(1,099; 1,724) | 2,038<br>(1,930; 2,146)  | 141<br>(113; 169)  | 1,285<br>(1,220; 1,350) |
| Lymphoma       | 9,834<br>(8,885; 10,782)   | 3,034<br>(2,556; 3,513)   | 1,046<br>(507; 1,585) | 277<br>(246; 308) | 677<br>(549; 805)       | 162<br>(23; 301)     | 638<br>(397; 880)       | 2,712<br>(2,524; 2,900)  | 132<br>(95; 169)   | 1,155<br>(1,052; 1,257) |
| Head and neck  | 9,650<br>(8,788; 10,511)   | 2,459<br>(2,053; 2,866)   | 702<br>(475; 930)     | 178<br>(153; 202) | 981<br>(815; 1,147)     | 614<br>(232; 997)    | 1,967<br>(1,594; 2,340) | 1,577<br>(1,471; 1,683)  | 126<br>(99; 153)   | 1,045<br>(976; 1,115)   |
| Other tumours  | 8,741<br>(8,348; 9,134)    | 2,336<br>(2,149; 2,523)   | 828<br>(689; 968)     | 238<br>(223; 253) | 682<br>(606; 757)       | 277<br>(123; 432)    | 979<br>(821; 1,138)     | 2,324<br>(2,252; 2,395)  | 106<br>(95; 118)   | 970<br>(929; 1,011)     |
| Liver          | 8,489<br>(7,809; 9,169)    | 2,315<br>(1,896; 2,735)   | 593<br>(460; 726)     | 270<br>(231; 309) | 521<br>(366; 676)       | 47<br>(-20; 114)     | 79<br>(-11; 169)        | 3,549<br>(3,290; 3,808)  | 101<br>(73; 129)   | 1,014<br>(875; 1,153)   |
| Colorectal     | 8,374<br>(8,036; 8,711)    | 2,111<br>(1,932; 2,289)   | 656<br>(541; 771)     | 176<br>(167; 186) | 746<br>(683; 808)       | 301<br>(192; 410)    | 1,170<br>(1,027; 1,313) | 2,098<br>(2,040; 2,155)  | 99<br>(90; 108)    | 1,017<br>(981; 1,053)   |
| Thyroid        | 7,850<br>(6,030; 9,671)    | 2,027<br>(999; 3,056)     | 191<br>(110; 273)     | 187<br>(125; 249) | 469<br>(141; 796)       | 35<br>(-34; 105)     | 1,367<br>(304; 2,430)   | 2,323<br>(1,942; 2,704)  | 173<br>(50; 295)   | 1,077<br>(857; 1,297)   |
| Leukemia       | 7,679<br>(7,080; 8,279)    | 2,110<br>(1,816; 2,404)   | 665<br>(433; 896)     | 194<br>(171; 217) | 588<br>(444; 733)       | 115<br>(5; 225)      | 520<br>(285; 754)       | 2,308<br>(2,169; 2,447)  | 106<br>(81; 131)   | 1,075<br>(941; 1,209)   |
| Testis         | 7,634<br>(3,577; 11,691)   | 3,484<br>(260; 6,707)     | 106<br>(-16; 228)     | 282<br>(76; 489)  | 318<br>(-12; 648)       | -                    | -                       | 2,629<br>(941; 4,316)    | 31<br>(-11; 73)    | 784<br>(120; 1,449)     |
| Cervix         | 7,232<br>(5,865; 8,599)    | 1,432<br>(915; 1,949)     | 405<br>(-2; 813)      | 163<br>(124; 203) | 807<br>(504; 1,110)     | 307<br>(-119; 732)   | 1,425<br>(696; 2,154)   | 1,739<br>(1,538; 1,940)  | 43<br>(22; 64)     | 910<br>(694; 1,127)     |
| Gastric        | 7,196<br>(6,811; 7,582)    | 1,681<br>(1,510; 1,852)   | 607<br>(456; 757)     | 183<br>(169; 198) | 565<br>(482; 648)       | 185<br>(56; 315)     | 624<br>(471; 777)       | 2,256<br>(2,173; 2,339)  | 101<br>(87; 116)   | 993<br>(944; 1,041)     |
| Pancreas       | 6,916<br>(6,630; 7,203)    | 1,592<br>(1,444; 1,739)   | 827<br>(681; 974)     | 232<br>(215; 249) | 341<br>(285; 396)       | 27<br>(-14; 68)      | 225<br>(136; 314)       | 2,703<br>(2,617; 2,789)  | 81<br>(70; 91)     | 890<br>(847; 933)       |
| Renal          | 6,843<br>(6,077; 7,609)    | 1,743<br>(1,352; 2,134)   | 624<br>(376; 872)     | 186<br>(166; 206) | 381<br>(274; 488)       | 237<br>(-147; 622)   | 250<br>(94; 406)        | 2,432<br>(2,296; 2,567)  | 138<br>(68; 208)   | 852<br>(776; 928)       |

|                    |                         |                         |                   |                   |                   |                   |                   |                         |                 |                       |
|--------------------|-------------------------|-------------------------|-------------------|-------------------|-------------------|-------------------|-------------------|-------------------------|-----------------|-----------------------|
| Lung               | 6,533<br>(6,360; 6,705) | 1,630<br>(1,529; 1,730) | 647<br>(559; 734) | 182<br>(176; 188) | 412<br>(384; 440) | 119<br>(83; 155)  | 287<br>(241; 332) | 2,173<br>(2,137; 2,209) | 87<br>(81; 93)  | 997<br>(975; 1,019)   |
| Ovary              | 6,442<br>(5,878; 7,007) | 1,397<br>(1,141; 1,652) | 640<br>(378; 903) | 202<br>(176; 228) | 575<br>(419; 731) | 114<br>(-10; 237) | 361<br>(155; 567) | 2,197<br>(2,070; 2,325) | 63<br>(46; 81)  | 892<br>(807; 977)     |
| Esophagus          | 6,394<br>(5,883; 6,904) | 1,541<br>(1,320; 1,762) | 621<br>(416; 826) | 145<br>(129; 161) | 535<br>(425; 644) | 141<br>(19; 264)  | 570<br>(386; 753) | 1,816<br>(1,698; 1,934) | 85<br>(70; 99)  | 941<br>(880; 1,002)   |
| Brain              | 5,995<br>(5,547; 6,444) | 2,333<br>(1,999; 2,668) | 506<br>(332; 679) | 233<br>(214; 251) | 313<br>(242; 384) | 108<br>(9; 208)   | 48<br>(7; 88)     | 1,715<br>(1,634; 1,797) | 93<br>(74; 111) | 647<br>(605; 689)     |
| <b>All Cancers</b> | 7,756<br>(7,645; 7,867) | 1,957<br>(1,901; 2,014) | 676<br>(631; 721) | 195<br>(191; 199) | 619<br>(598; 640) | 224<br>(187; 260) | 791<br>(748; 834) | 2,194<br>(2,173; 2,215) | 98<br>(94; 102) | 1,001<br>(989; 1,014) |

Data sources: Ontario Cancer Registry, Cancer Care Ontario and administrative health data housed at the Institute for Clinical Evaluative Sciences (mean direct costs by phase of care).

Legend: ED – emergency department

Confidential

1  
2  
3  
4  
5  
6  
7  
8  
9  
10  
11  
12  
13  
14  
15  
16  
17  
18  
19  
20  
21  
22  
23  
24  
25  
26  
27  
28  
29  
30  
31  
32  
33  
34  
35  
36  
37  
38  
39  
40  
41  
42  
43  
44  
45  
46  
47  
48  
49

**Table 2. A** – Mean (95% confidence interval) direct healthcare costs by tumour site for initial phase cancer patients that live beyond the first year post-diagnosis (long-term survivors) in 2009 Canadian dollars

| Type of Cancer | Total Cost                 | Hospital-based Care        |                         |                   | Tertiary Care           |                         |                         | Other                   |                         |                         |
|----------------|----------------------------|----------------------------|-------------------------|-------------------|-------------------------|-------------------------|-------------------------|-------------------------|-------------------------|-------------------------|
|                |                            | Inpatient Hospitalization  | Same-day Surgery        | ED Visits         | Home Care               | Continuing Care         | Long-term Care          | Diagnostic Tests        | Physician Services      | Outpatient Drugs        |
| Esophagus      | 54,445<br>(51,459; 57,432) | 27,506<br>(25,314; 29,698) | 3,986<br>(3,508; 4,464) | 410<br>(373; 447) | 4,058<br>(3,806; 4,310) | 2,099<br>(687; 3,511)   | 694<br>(338; 1,050)     | 2,542<br>(2,408; 2,676) | 4,757<br>(4,567; 4,948) | 2,268<br>(2,137; 2,399) |
| Myeloma        | 50,908<br>(48,094; 53,722) | 19,844<br>(18,877; 20,810) | 6,804<br>(5,304; 8,304) | 476<br>(445; 506) | 3,650<br>(3,448; 3,851) | 4,125<br>(2,364; 5,887) | 1,690<br>(1,209; 2,171) | 4,295<br>(4,100; 4,490) | 1,974<br>(1,881; 2,067) | 4,204<br>(3,998; 4,410) |
| Brain          | 46,428<br>(44,549; 48,308) | 19,282<br>(18,396; 20,168) | 592<br>(136; 1,048)     | 490<br>(456; 525) | 3,250<br>(2,981; 3,519) | 4,615<br>(3,553; 5,678) | 433<br>(234; 632)       | 2,076<br>(1,961; 2,190) | 4,945<br>(4,784; 5,106) | 5,046<br>(4,654; 5,439) |
| Pancreas       | 43,518<br>(41,915; 45,122) | 19,820<br>(18,813; 20,827) | 1,830<br>(1,472; 2,187) | 471<br>(423; 518) | 3,350<br>(3,088; 3,612) | 1,011<br>(364; 1,659)   | 383<br>(161; 605)       | 2,690<br>(2,538; 2,841) | 3,812<br>(3,671; 3,954) | 2,147<br>(1,960; 2,335) |
| Gastric        | 42,033<br>(40,518; 43,548) | 20,457<br>(19,589; 21,325) | 2,433<br>(2,145; 2,721) | 368<br>(339; 397) | 2,986<br>(2,828; 3,144) | 2,384<br>(1,536; 3,232) | 948<br>(645; 1,252)     | 2,391<br>(2,304; 2,478) | 3,620<br>(3,521; 3,719) | 1,663<br>(1,581; 1,745) |
| Colorectal     | 37,601<br>(37,027; 38,175) | 15,738<br>(15,566; 15,911) | 2,470<br>(2,367; 2,572) | 286<br>(279; 292) | 2,679<br>(2,637; 2,720) | 2,902<br>(2,497; 3,307) | 1,798<br>(1,638; 1,957) | 1,985<br>(1,961; 2,008) | 3,040<br>(3,014; 3,066) | 1,296<br>(1,275; 1,317) |
| Liver          | 33,350<br>(31,221; 35,480) | 15,658<br>(14,218; 17,097) | 1,082<br>(875; 1,288)   | 412<br>(353; 472) | 1,642<br>(1,429; 1,856) | 1,076<br>(522; 1,631)   | 492<br>(170; 815)       | 6,564<br>(6,015; 7,114) | 3,754<br>(3,534; 3,975) | 2,289<br>(2,050; 2,528) |
| Ovary          | 32,287<br>(31,083; 33,491) | 12,665<br>(12,259; 13,070) | 3,020<br>(2,529; 3,510) | 267<br>(250; 285) | 2,566<br>(2,432; 2,699) | 1,458<br>(747; 2,169)   | 744<br>(460; 1,028)     | 2,210<br>(2,136; 2,283) | 2,290<br>(2,234; 2,346) | 1,265<br>(1,199; 1,331) |
| Lung           | 32,250<br>(31,744; 32,756) | 12,833<br>(12,571; 13,095) | 2,199<br>(2,090; 2,308) | 331<br>(321; 342) | 2,205<br>(2,133; 2,278) | 1,470<br>(1,187; 1,753) | 677<br>(552; 803)       | 2,792<br>(2,746; 2,839) | 3,158<br>(3,114; 3,201) | 1,896<br>(1,855; 1,938) |
| Head and neck  | 31,964<br>(31,060; 32,869) | 11,055<br>(10,673; 11,437) | 2,675<br>(2,465; 2,884) | 210<br>(199; 221) | 2,271<br>(2,182; 2,360) | 1,361<br>(814; 1,907)   | 568<br>(388; 748)       | 1,352<br>(1,311; 1,393) | 2,521<br>(2,459; 2,583) | 1,517<br>(1,467; 1,568) |
| Lymphoma       | 31,092<br>(30,135; 32,049) | 7,591<br>(7,201; 7,982)    | 4,882<br>(4,567; 5,198) | 281<br>(267; 295) | 1,677<br>(1,602; 1,751) | 1,202<br>(638; 1,766)   | 651<br>(434; 868)       | 2,687<br>(2,618; 2,755) | 3,456<br>(3,401; 3,511) | 2,587<br>(2,469; 2,705) |
| Leukemia       | 30,480<br>(29,002; 31,958) | 17,185<br>(16,343; 18,026) | 2,477<br>(1,936; 3,018) | 263<br>(246; 281) | 1,038<br>(964; 1,113)   | 1,550<br>(798; 2,303)   | 816<br>(545; 1,086)     | 2,159<br>(2,089; 2,230) | 999<br>(957; 1,041)     | 3,195<br>(2,984; 3,406) |
| Other tumours  | 29,928<br>(29,112; 30,743) | 13,033<br>(12,687; 13,379) | 2,213<br>(2,063; 2,363) | 255<br>(244; 265) | 2,097<br>(2,028; 2,165) | 1,881<br>(1,361; 2,401) | 1,045<br>(826; 1,265)   | 2,097<br>(2,050; 2,144) | 2,774<br>(2,724; 2,823) | 1,454<br>(1,373; 1,534) |
| Bladder        | 25,481<br>(24,625; 26,338) | 9,233<br>(8,934; 9,532)    | 6,161<br>(5,863; 6,459) | 220<br>(209; 232) | 1,278<br>(1,211; 1,344) | 1,469<br>(901; 2,036)   | 1,190<br>(917; 1,464)   | 1,883<br>(1,833; 1,932) | 1,865<br>(1,822; 1,908) | 1,184<br>(1,150; 1,217) |
| Female breast  | 23,274<br>(22,980; 23,568) | 3,977<br>(3,909; 4,046)    | 2,435<br>(2,340; 2,530) | 148<br>(145; 152) | 1,810<br>(1,783; 1,836) | 982<br>(786; 1,177)     | 741<br>(654; 828)       | 2,393<br>(2,373; 2,412) | 2,000<br>(1,985; 2,015) | 1,209<br>(1,191; 1,227) |
| Renal          | 21,856<br>(21,021; 22,691) | 11,523<br>(11,195; 11,851) | 799<br>(698; 900)       | 196<br>(186; 207) | 882<br>(820; 944)       | 1,217<br>(696; 1,739)   | 810<br>(571; 1,049)     | 2,634<br>(2,562; 2,705) | 2,464<br>(2,386; 2,543) | 1,025<br>(973; 1,076)   |
| Cervix         | 20,653<br>(19,855; 21,450) | 6,761<br>(6,400; 7,121)    | 1,473<br>(1,326; 1,619) | 165<br>(150; 180) | 772<br>(692; 852)       | 480<br>(75; 884)        | 258<br>(79; 438)        | 1,365<br>(1,299; 1,431) | 2,955<br>(2,827; 3,084) | 488<br>(440; 536)       |
| Corpus uteri   | 18,337<br>(17,612; 19,063) | 7,577<br>(7,347; 7,806)    | 1,116<br>(1,034; 1,198) | 121<br>(113; 129) | 962<br>(903; 1,021)     | 1,106<br>(600; 1,612)   | 913<br>(657; 1,169)     | 1,561<br>(1,520; 1,602) | 1,479<br>(1,447; 1,511) | 700<br>(674; 726)       |

|                    |                            |                         |                         |                   |                         |                         |                   |                         |                         |                         |
|--------------------|----------------------------|-------------------------|-------------------------|-------------------|-------------------------|-------------------------|-------------------|-------------------------|-------------------------|-------------------------|
| Prostate           | 15,646<br>(15,426; 15,867) | 4,455<br>(4,393; 4,518) | 925<br>(887; 963)       | 116<br>(114; 119) | 504<br>(489; 519)       | 700<br>(550; 849)       | 551<br>(479; 624) | 1,716<br>(1,699; 1,732) | 1,292<br>(1,280; 1,305) | 2,108<br>(2,085; 2,131) |
| Melanoma           | 15,065<br>(14,521; 15,609) | 1,911<br>(1,804; 2,019) | 7,001<br>(6,612; 7,391) | 100<br>(95; 105)  | 686<br>(649; 724)       | 589<br>(319; 860)       | 450<br>(327; 573) | 1,558<br>(1,525; 1,590) | 847<br>(822; 871)       | 881<br>(838; 925)       |
| Testis             | 14,728<br>(14,035; 15,421) | 4,219<br>(3,819; 4,620) | 1,272<br>(1,084; 1,460) | 136<br>(121; 150) | 445<br>(381; 509)       | 60<br>(-22; 142)        | 76<br>(-14; 165)  | 1,634<br>(1,531; 1,736) | 2,959<br>(2,871; 3,048) | 576<br>(503; 649)       |
| Thyroid            | 11,727<br>(11,362; 12,093) | 6,273<br>(6,154; 6,393) | 450<br>(374; 525)       | 85<br>(79; 90)    | 188<br>(164; 212)       | 308<br>(69; 548)        | 145<br>(58; 232)  | 2,690<br>(2,634; 2,746) | 1,081<br>(1,060; 1,103) | 308<br>(286; 329)       |
| <b>All Cancers</b> | 25,513<br>(25,359; 25,667) | 8,804<br>(8,746; 8,861) | 2,387<br>(2,344; 2,429) | 200<br>(198; 202) | 1,582<br>(1,569; 1,595) | 1,377<br>(1,279; 1,475) | 847<br>(806; 888) | 2,120<br>(2,110; 2,130) | 2,162<br>(2,153; 2,171) | 1,541<br>(1,530; 1,553) |

Data sources: Ontario Cancer Registry, Cancer Care Ontario and administrative health data housed at the Institute for Clinical Evaluative Sciences (mean direct costs by phase of care).

Legend: ED – emergency department

Confidential

1  
2  
3  
4  
5  
6  
7  
8  
9  
10  
11  
12  
13  
14  
15  
16  
17  
18  
19  
20  
21  
22  
23  
24  
25  
26  
27  
28  
29  
30  
31  
32  
33  
34  
35  
36  
37  
38  
39  
40  
41  
42  
43  
44  
45  
46  
47  
48  
49

**Table 2. A** – Mean (95% confidence interval) direct healthcare costs by tumour site for initial phase cancer patients that live beyond the first year post-diagnosis (long-term survivors) in 2009 Canadian dollars (cont.)

| Type of Cancer | Cancer-specific Care       |                         |                         |
|----------------|----------------------------|-------------------------|-------------------------|
|                | Total Cost                 | Chemotherapy            | Radiation Therapy       |
| Esophagus      | 54,445<br>(51,459; 57,432) | 4,031<br>(3,762; 4,300) | 2,093<br>(1,918; 2,268) |
| Myeloma        | 50,908<br>(48,094; 53,722) | 3,502<br>(3,338; 3,667) | 344<br>(311; 377)       |
| Brain          | 46,428<br>(44,549; 48,308) | 2,647<br>(2,497; 2,797) | 3,051<br>(2,918; 3,184) |
| Pancreas       | 43,518<br>(41,915; 45,122) | 7,320<br>(6,898; 7,741) | 685<br>(604; 767)       |
| Gastric        | 42,033<br>(40,518; 43,548) | 3,794<br>(3,605; 3,983) | 989<br>(919; 1,059)     |
| Colorectal     | 37,601<br>(37,027; 38,175) | 4,776<br>(4,706; 4,845) | 633<br>(618; 648)       |
| Liver          | 33,350<br>(31,221; 35,480) | 320<br>(247; 393)       | 60<br>(30; 90)          |
| Ovary          | 32,287<br>(31,083; 33,491) | 5,709<br>(5,559; 5,858) | 94<br>(75; 112)         |
| Lung           | 32,250<br>(31,744; 32,756) | 3,600<br>(3,520; 3,680) | 1,087<br>(1,057; 1,117) |
| Head and neck  | 31,964<br>(31,060; 32,869) | 3,323<br>(3,210; 3,436) | 5,112<br>(4,918; 5,305) |
| Lymphoma       | 31,092<br>(30,135; 32,049) | 5,355<br>(5,161; 5,548) | 723<br>(687; 758)       |
| Leukemia       | 30,480<br>(29,002; 31,958) | 751<br>(690; 811)       | 47<br>(37; 57)          |
| Other tumours  | 29,928<br>(29,112; 30,743) | 1,952<br>(1,885; 2,018) | 1,129<br>(1,075; 1,183) |
| Bladder        | 25,481<br>(24,625; 26,338) | 712<br>(662; 763)       | 286<br>(261; 310)       |
| Female breast  | 23,274<br>(22,980; 23,568) | 5,012<br>(4,948; 5,076) | 2,568<br>(2,541; 2,596) |
| Renal          | 21,856<br>(21,021; 22,691) | 242<br>(212; 272)       | 63<br>(54; 73)          |
| Cervix         | 20,653<br>(19,855; 21,450) | 2,468<br>(2,343; 2,592) | 3,468<br>(3,316; 3,620) |
| Corpus uteri   | 18,337<br>(17,612; 19,063) | 1,086<br>(1,038; 1,134) | 1,717<br>(1,654; 1,779) |



|                    |                            |                         |                         |
|--------------------|----------------------------|-------------------------|-------------------------|
| Prostate           | 15,646<br>(15,426; 15,867) | 1,222<br>(1,199; 1,246) | 2,055<br>(2,025; 2,086) |
| Melanoma           | 15,065<br>(14,521; 15,609) | 939<br>(885; 994)       | 101<br>(83; 120)        |
| Testis             | 14,728<br>(14,035; 15,421) | 2,624<br>(2,478; 2,770) | 727<br>(675; 779)       |
| Thyroid            | 11,727<br>(11,362; 12,093) | 115<br>(98; 132)        | 84<br>(65; 103)         |
| <b>All Cancers</b> | 25,513<br>(25,359; 25,667) | 2,982<br>(2,960; 3,003) | 1,512<br>(1,500; 1,524) |

Data sources: Ontario Cancer Registry, Cancer Care Ontario and administrative health data housed at the Institute for Clinical Evaluative Sciences (mean direct costs by phase of care).

Legend: ED – emergency department

Confidential

1  
2  
3  
4  
5  
6  
7  
8  
9  
10  
11  
12  
13  
14  
15  
16  
17  
18  
19  
20  
21  
22  
23  
24  
25  
26  
27  
28  
29  
30  
31  
32  
33  
34  
35  
36  
37  
38  
39  
40  
41  
42  
43  
44  
45  
46  
47  
48  
49

**Table 2. B** – Mean (95% confidence interval) direct healthcare costs by tumour site for initial phase cancer patients that do **not** live beyond the first year post-diagnosis (short-term survivors) in 2009 Canadian dollars

| Type of Cancer | Total Cost                  | Hospital-based Care        |                         |                     | Tertiary Care           |                          |                   | Other                   |                         |                         |
|----------------|-----------------------------|----------------------------|-------------------------|---------------------|-------------------------|--------------------------|-------------------|-------------------------|-------------------------|-------------------------|
|                |                             | Inpatient Hospitalization  | Same-day Surgery        | ED Visits           | Home Care               | Continuing Care          | Long-term Care    | Diagnostic Tests        | Physician Services      | Outpatient Drugs        |
| Testis         | 81,506<br>(58,086; 104,925) | 55,771<br>(36,692; 74,851) | 836<br>(191; 1,481)     | 845<br>(487; 1,202) | 2,687<br>(1,602; 3,773) | 1,712<br>(-1,599; 5,023) | -                 | 2,262<br>(1,185; 3,340) | 7,855<br>(5,880; 9,830) | 3,424<br>(1,936; 4,913) |
| Leukemia       | 62,482<br>(59,800; 65,164)  | 50,915<br>(48,633; 53,197) | 2,778<br>(1,729; 3,827) | 663<br>(607; 718)   | 1,922<br>(1,767; 2,077) | 1,081<br>(753; 1,410)    | 167<br>(95; 239)  | 1,066<br>(982; 1,150)   | 1,350<br>(1,255; 1,444) | 1,563<br>(1,358; 1,768) |
| Lymphoma       | 56,199<br>(53,865; 58,533)  | 37,693<br>(35,718; 39,668) | 2,554<br>(1,992; 3,116) | 742<br>(684; 801)   | 2,710<br>(2,476; 2,944) | 1,789<br>(1,324; 2,254)  | 195<br>(123; 267) | 1,649<br>(1,516; 1,781) | 3,138<br>(2,963; 3,313) | 2,124<br>(1,902; 2,346) |
| Myeloma        | 55,092<br>(51,973; 58,212)  | 35,978<br>(33,835; 38,121) | 3,221<br>(1,457; 4,984) | 727<br>(656; 798)   | 2,816<br>(2,503; 3,128) | 3,763<br>(2,731; 4,796)  | 593<br>(400; 786) | 2,053<br>(1,769; 2,338) | 2,049<br>(1,787; 2,311) | 2,169<br>(1,893; 2,446) |
| Brain          | 55,045<br>(53,662; 56,427)  | 33,085<br>(32,003; 34,168) | 230<br>(161; 298)       | 509<br>(476; 543)   | 3,964<br>(3,740; 4,188) | 7,045<br>(6,389; 7,702)  | 269<br>(205; 333) | 866<br>(796; 935)       | 3,571<br>(3,429; 3,712) | 2,192<br>(2,005; 2,380) |
| Head and neck  | 51,016<br>(49,158; 52,874)  | 29,701<br>(28,243; 31,158) | 1,218<br>(965; 1,471)   | 495<br>(458; 533)   | 3,668<br>(3,456; 3,881) | 3,413<br>(2,839; 3,986)  | 218<br>(146; 290) | 852<br>(796; 909)       | 2,933<br>(2,806; 3,060) | 1,791<br>(1,683; 1,899) |
| Ovary          | 47,921<br>(46,008; 49,834)  | 29,854<br>(28,350; 31,359) | 1,957<br>(1,378; 2,536) | 547<br>(498; 595)   | 3,750<br>(3,448; 4,051) | 3,186<br>(2,526; 3,846)  | 143<br>(71; 214)  | 1,438<br>(1,313; 1,563) | 2,211<br>(2,078; 2,344) | 1,296<br>(1,176; 1,416) |
| Bladder        | 47,542<br>(45,780; 49,303)  | 31,844<br>(30,290; 33,399) | 1,522<br>(1,292; 1,751) | 590<br>(550; 630)   | 2,891<br>(2,710; 3,071) | 2,490<br>(2,037; 2,944)  | 461<br>(353; 568) | 1,575<br>(1,482; 1,669) | 3,168<br>(3,021; 3,314) | 1,189<br>(1,079; 1,299) |
| Esophagus      | 45,333<br>(43,714; 46,952)  | 26,701<br>(25,313; 28,088) | 2,179<br>(1,965; 2,393) | 520<br>(487; 552)   | 3,563<br>(3,360; 3,767) | 2,385<br>(1,994; 2,776)  | 133<br>(84; 182)  | 1,331<br>(1,239; 1,422) | 3,075<br>(2,930; 3,219) | 1,692<br>(1,585; 1,798) |
| Colorectal     | 44,738<br>(43,950; 45,527)  | 29,261<br>(28,586; 29,937) | 1,201<br>(1,072; 1,331) | 488<br>(470; 505)   | 3,159<br>(3,062; 3,257) | 2,750<br>(2,522; 2,979)  | 344<br>(299; 388) | 1,186<br>(1,143; 1,229) | 2,852<br>(2,787; 2,917) | 1,171<br>(1,107; 1,234) |
| Cervix         | 43,924<br>(40,889; 46,959)  | 23,652<br>(21,553; 25,750) | 1,021<br>(582; 1,459)   | 561<br>(480; 643)   | 3,253<br>(2,806; 3,700) | 2,698<br>(1,747; 3,649)  | 130<br>(25; 236)  | 1,450<br>(1,284; 1,616) | 3,515<br>(3,096; 3,935) | 1,784<br>(1,459; 2,109) |
| Gastric        | 42,870<br>(41,531; 44,209)  | 28,346<br>(27,144; 29,547) | 1,394<br>(1,210; 1,577) | 526<br>(495; 557)   | 3,052<br>(2,914; 3,190) | 2,246<br>(1,940; 2,552)  | 151<br>(108; 193) | 1,188<br>(1,128; 1,249) | 2,642<br>(2,547; 2,736) | 1,352<br>(1,274; 1,430) |
| Renal          | 42,420<br>(40,528; 44,313)  | 26,847<br>(25,352; 28,343) | 905<br>(353; 1,458)     | 591<br>(545; 636)   | 3,271<br>(3,004; 3,539) | 2,486<br>(1,999; 2,973)  | 131<br>(69; 194)  | 1,830<br>(1,693; 1,967) | 3,476<br>(3,250; 3,702) | 1,612<br>(1,381; 1,842) |
| Other tumours  | 41,345<br>(40,431; 42,259)  | 26,877<br>(26,096; 27,658) | 1,386<br>(1,214; 1,558) | 529<br>(507; 551)   | 3,174<br>(3,058; 3,291) | 2,142<br>(1,921; 2,362)  | 189<br>(150; 229) | 1,356<br>(1,299; 1,413) | 2,544<br>(2,466; 2,622) | 1,360<br>(1,288; 1,432) |
| Thyroid        | 40,574<br>(34,710; 46,439)  | 27,226<br>(22,094; 32,359) | 715<br>(159; 1,272)     | 505<br>(383; 628)   | 2,272<br>(1,695; 2,849) | 2,457<br>(1,119; 3,796)  | 26<br>(-11; 63)   | 1,385<br>(1,043; 1,727) | 2,514<br>(2,148; 2,880) | 1,200<br>(747; 1,653)   |
| Corpus uteri   | 37,806<br>(35,286; 40,326)  | 23,642<br>(21,482; 25,802) | 785<br>(531; 1,038)     | 539<br>(471; 607)   | 2,801<br>(2,438; 3,164) | 2,679<br>(1,854; 3,504)  | 343<br>(165; 520) | 1,378<br>(1,233; 1,522) | 2,313<br>(2,099; 2,527) | 1,162<br>(1,009; 1,315) |
| Female breast  | 37,086<br>(35,793; 38,380)  | 19,440<br>(18,521; 20,359) | 1,531<br>(1,237; 1,825) | 490<br>(458; 522)   | 3,661<br>(3,424; 3,898) | 3,167<br>(2,604; 3,731)  | 488<br>(377; 599) | 1,648<br>(1,564; 1,732) | 1,960<br>(1,849; 2,071) | 1,490<br>(1,389; 1,591) |
| Pancreas       | 35,823<br>(35,033; 36,613)  | 21,222<br>(20,591; 21,852) | 1,439<br>(1,257; 1,621) | 551<br>(525; 577)   | 3,371<br>(3,236; 3,506) | 1,543<br>(1,343; 1,744)  | 47<br>(26; 69)    | 1,261<br>(1,199; 1,322) | 1,814<br>(1,747; 1,882) | 1,622<br>(1,532; 1,712) |

|                    |                            |                            |                         |                   |                         |                         |                   |                         |                         |                         |
|--------------------|----------------------------|----------------------------|-------------------------|-------------------|-------------------------|-------------------------|-------------------|-------------------------|-------------------------|-------------------------|
| Melanoma           | 36,809<br>(34,706; 38,912) | 18,215<br>(16,825; 19,605) | 4,720<br>(3,460; 5,980) | 528<br>(473; 583) | 3,177<br>(2,849; 3,505) | 2,206<br>(1,550; 2,861) | 230<br>(110; 351) | 1,545<br>(1,378; 1,712) | 2,759<br>(2,544; 2,973) | 1,470<br>(1,285; 1,656) |
| Lung               | 34,620<br>(34,252; 34,987) | 19,689<br>(19,392; 19,987) | 1,351<br>(1,278; 1,424) | 553<br>(541; 565) | 2,771<br>(2,716; 2,827) | 2,180<br>(2,067; 2,293) | 133<br>(116; 150) | 1,318<br>(1,290; 1,346) | 2,224<br>(2,188; 2,260) | 1,425<br>(1,387; 1,463) |
| Prostate           | 34,462<br>(33,176; 35,749) | 19,968<br>(18,991; 20,944) | 740<br>(561; 919)       | 527<br>(489; 566) | 2,205<br>(2,026; 2,384) | 3,273<br>(2,700; 3,846) | 580<br>(460; 700) | 1,553<br>(1,463; 1,643) | 1,527<br>(1,427; 1,627) | 3,008<br>(2,873; 3,143) |
| Liver              | 28,209<br>(26,379; 30,038) | 18,287<br>(16,676; 19,899) | 887<br>(630; 1,144)     | 614<br>(552; 677) | 2,125<br>(1,918; 2,332) | 1,396<br>(1,030; 1,763) | 93<br>(35; 150)   | 1,821<br>(1,638; 2,003) | 1,657<br>(1,480; 1,835) | 896<br>(793; 1,000)     |
| <b>All Cancers</b> | 41,075<br>(40,808; 41,343) | 25,354<br>(25,131; 25,576) | 1,421<br>(1,363; 1,479) | 544<br>(537; 551) | 3,034<br>(3,000; 3,069) | 2,530<br>(2,454; 2,607) | 214<br>(202; 227) | 1,323<br>(1,307; 1,340) | 2,471<br>(2,448; 2,494) | 1,507<br>(1,484; 1,530) |

Data sources: Ontario Cancer Registry, Cancer Care Ontario and administrative health data housed at the Institute for Clinical Evaluative Sciences (mean direct costs by phase of care).

Legend: ED – emergency department

1  
2  
3  
4  
5  
6  
7  
8  
9  
10  
11  
12  
13  
14  
15  
16  
17  
18  
19  
20  
21  
22  
23  
24  
25  
26  
27  
28  
29  
30  
31  
32  
33  
34  
35  
36  
37  
38  
39  
40  
41  
42  
43  
44  
45  
46  
47  
48  
49

**Table 2. B** – Mean (95% confidence interval) direct healthcare costs by tumour site for initial phase cancer patients that do **not** live beyond the first year post-diagnosis (short-term survivors) in 2009 Canadian dollars (cont.)

| Type of Cancer | Cancer-specific Care        |                         |                         |
|----------------|-----------------------------|-------------------------|-------------------------|
|                | Total Cost                  | Chemotherapy            | Radiation Therapy       |
| Testis         | 81,506<br>(58,086; 104,925) | 5,909<br>(4,454; 7,364) | 203<br>(16; 391)        |
| Leukemia       | 62,482<br>(59,800; 65,164)  | 908<br>(821; 996)       | 69<br>(49; 89)          |
| Lymphoma       | 56,199<br>(53,865; 58,533)  | 3,256<br>(2,912; 3,601) | 348<br>(262; 435)       |
| Myeloma        | 55,092<br>(51,973; 58,212)  | 1,394<br>(1,200; 1,587) | 330<br>(283; 376)       |
| Brain          | 55,045<br>(53,662; 56,427)  | 1,420<br>(1,317; 1,522) | 1,894<br>(1,797; 1,991) |
| Head and neck  | 51,016<br>(49,158; 52,874)  | 2,688<br>(2,481; 2,896) | 4,038<br>(3,720; 4,356) |
| Ovary          | 47,921<br>(46,008; 49,834)  | 3,505<br>(3,225; 3,786) | 35<br>(22; 47)          |
| Bladder        | 47,542<br>(45,780; 49,303)  | 1,302<br>(1,162; 1,442) | 510<br>(452; 569)       |
| Esophagus      | 45,333<br>(43,714; 46,952)  | 2,236<br>(2,084; 2,388) | 1,520<br>(1,414; 1,625) |
| Colorectal     | 44,738<br>(43,950; 45,527)  | 2,077<br>(1,983; 2,171) | 249<br>(229; 269)       |
| Cervix         | 43,924<br>(40,889; 46,959)  | 2,811<br>(2,402; 3,221) | 3,048<br>(2,630; 3,466) |
| Gastric        | 42,870<br>(41,531; 44,209)  | 1,597<br>(1,486; 1,708) | 376<br>(334; 419)       |
| Renal          | 42,420<br>(40,528; 44,313)  | 882<br>(782; 981)       | 389<br>(346; 431)       |
| Other tumours  | 41,345<br>(40,431; 42,259)  | 1,263<br>(1,192; 1,333) | 525<br>(478; 573)       |
| Thyroid        | 40,574<br>(34,710; 46,439)  | 1,185<br>(776; 1,594)   | 1,088<br>(756; 1,420)   |
| Corpus uteri   | 37,806<br>(35,286; 40,326)  | 1,240<br>(1,042; 1,439) | 925<br>(748; 1,102)     |
| Female breast  | 37,086<br>(35,793; 38,380)  | 2,416<br>(2,216; 2,616) | 796<br>(705; 886)       |
| Pancreas       | 35,823<br>(35,033; 36,613)  | 2,755<br>(2,613; 2,897) | 198<br>(174; 222)       |

|                    |                            |                         |                   |
|--------------------|----------------------------|-------------------------|-------------------|
| Melanoma           | 36,809<br>(34,706; 38,912) | 1,381<br>(1,153; 1,609) | 578<br>(484; 672) |
| Lung               | 34,620<br>(34,252; 34,987) | 2,169<br>(2,118; 2,219) | 807<br>(787; 826) |
| Prostate           | 34,462<br>(33,176; 35,749) | 583<br>(502; 664)       | 498<br>(425; 570) |
| Liver              | 28,209<br>(26,379; 30,038) | 359<br>(295; 423)       | 72<br>(45; 99)    |
| <b>All Cancers</b> | 41,075<br>(40,808; 41,343) | 1,936<br>(1,907; 1,965) | 740<br>(724; 756) |

Data sources: Ontario Cancer Registry, Cancer Care Ontario and administrative health data housed at the Institute for Clinical Evaluative Sciences (mean direct costs by phase of care).

Legend: ED – emergency department

Confidential
